# Supplementary material for: Comparative morphology and systematics of the cookiecutter sharks, genus Isistius Gill (1864) (Chondrichthyes: Squaliformes: Dalatiidae)
Source: PLoS One. 2018 Aug 20;13(8):e0201913. doi: 10.1371/journal.pone.0201913 (PMC6101376; doi:10.1371/journal.pone.0201913)
Supplement: S1 Table — (XLSX) [file pone.0201913.s004.xlsx]

## Sheet: bras
Species	Catalog number	Type status	Ocean basin	TL	PCL	PD2	PD1	SVL	PP2	PP1	HDL	PG1	PSP	POB	PRN	POR	PINL	INFL	MOW	ULA	INW	INO	EYL	EYH	SPL	GS1	GS5	IDS	DCS	PPS	PCA	D1L	D1A	D1B	D1H	D1I	D1P	D2L	D2A	D2B	D2H	D2I	D2P	P1A	P1I	P1B	P1P	P2L	P2H
Isistius brasiliensis	MZUSP 16360		Atlantic	470.64	408.68	344.73	286.16	294.99	281.82	90.19	85.92	72.48	37.85	15.12	6.33	30.71	10.2	21.88	32.63	19.11	6.75	22.91	15.43	9.7	8.78	4.15	3.15	44.23	48.83	209.98	76.93	27.13	21.25	15.74	14.9	10.93	11.76	30.8	22.51	15.05	10.53	15.93	15.58	29.84	16.21	17.94	23.21	40.57	17.86
Isistius brasiliensis	NMW 78801		Atlantic	163	139	117	99	102.85	98.06	33.96	35.06	29.06	16.59	5.5	2.18	11.96	3.12	10.29	10.61	8.11	2.17	10.02	7.57	4.38	3.27	1.13	1.78	13.02	18.66	60.76	30.36	7.6	5.43	4.75	2.12	3.23	2.06	11.3	6.84	7.13	3.05	5.84	5.37	13.86	10.65	4.9	4.03	9.85	2.93
Isistius brasiliensis	NMW 50132		Pacific	361	317	257	212	238	222	84.04	83.88	66.06	32.56	13.19	6.47	24.51	7.58	22.6	34.33	21.28	7.53	19.48	13.05	8.91	8.97	3.18	3.01	30.2	33.17	120.9	68.21	29.46	19.21	14.59	7.46	14.79	12.69	32.45	19.04	17.99	7.48	15.45	15.91	26.56	16.18	14.72	20.01	41.33	9.36
Isistius brasiliensis	NMW 60844		Indian	318	268	219	181	202	195	65.52	65.03	52.68	28.69	9.54	4.18	16.57	4.36	18.48	21.54	18.73	5.88	17.54	12.29	6.18	5.71	3.74	3.23	31.03	36.95	115.55	58.77	16.21	14.73	8.17	7.6	9.68	5.71	19.53	12.84	10.18	7.5	9.12	10.06	20.02	15.79	9.07	8.85	21.97	9.2
Isistius brasiliensis	NMW 76230	H	Pacific	162	131.95	109.91	91.68	102.28	95.15	36.9	35.85	30.13	16.33	6.39	2.72	12.02	3.71	11.55	10.79	8.98	3.39	9.61	7.71	4.51	3.69	1.2	1.13	13.85	17.99	57.48	27.29	12.4	9.86	5.64	2.43	7.12	3.45	13.33	9	6.78	3.5	7.46	5.63	14.67	9.95	5.72	10.64	15.51	5.37
Isistius brasiliensis	ZMH 10215		Pacific	209	175	146	124	129.94	121.07	45.86	44.81	37.74	20.09	8.19	2.31	15.58	3.53	12.01	14.95	13.79	3.29	13.64	9.34	6.79	4.68	2.05	1.11	15.25	20.67	74.64	35.85	15.11	9.9	7.31	3.55	7.77	6.11	17.26	11.47	8.79	4.18	8.39	7.1	15.8	11.66	6.06	8.18	16.91	6.7
Isistius brasiliensis	ZMH 103780		Atlantic	321	374	326	189	206	195	67.42	67.09	53.89	28.87	11.78	4.65	20.68	5.9	19.61	22.88	18.94	4.64	17.4	11.93	7.38	7.6	2.53	2.08	30.12	35.15	118.65	57.91	20.07	14.74	11.46	4.33	10.46	7.34	21.02	14.72	12.05	5.31	11.24	11.06	24.7	14.74	11.09	14.17	28.06	7.2
Isistius brasiliensis	ZMH 103882		Atlantic	384	323	269	229	254	237	80.66	80.62	64.34	35.34	13.27	4.86	27.13	6.83	24.96	24.28	21.41	5.67	21.03	13.88	9.22	7.27	2.87	2.33	35.46	41.15	132.57	63.3	24.79	18.55	9.96	6.51	13.13	10.93	26.99	19.7	15.69	8.72	13.39	14.7	26.06	17.04	13.75	18.42	39.22	10.42
Isistius brasiliensis	ZMH 106154		Atlantic	185	154	127.75	108.05	114.39	109.21	40.15	41.37	34.51	19.17	7.26	2.89	13.58	3.24	13.96	15.07	12.16	2.79	10.72	8.82	5.2	3.99	1.84	1.75	17.62	19.23	66.06	35.36	10.78	8.26	5.75	2.75	6.87	5.22	13.42	7.6	6.47	2.84	7.01	6.91	16.51	11.28	6.47	7.69	17.32	3.45
Isistius brasiliensis	ZMH 108396		Atlantic	286	241	206	171	183	173	59.22	58.63	47.8	26.6	10.46	4.63	20.82	6.4	18.81	18.86	15.17	4.44	17.35	11.05	8.05	6.42	3.29	2.55	26.58	26.24	105.37	51.17	19.96	16.22	10.55	5.02	10.68	9.62	19.51	12.29	9.82	6.03	10.45	11.65	21.69	13.63	11.34	14.74	24.93	6.12
Isistius brasiliensis	ZMH 108492 (1)		Atlantic	466	393	331	275	297	287	92.85	93.1	76.06	38.85	16.19	5.78	28.12	8.01	28.83	29.57	27.01	6.99	26.42	15.28	10.52	8.43	4.62	3.68	40.41	45.87	177	74.53	31.49	23.61	16.01	10.74	16.68	14.68	34.82	20.55	17.61	11.3	16.13	14.83	35.79	19.93	17.03	22.81	40.27	18.98
Isistius brasiliensis	ZMH 108492 (2)		Atlantic	395	334	283	242	259	242	78.63	78.99	63.81	35.41	15.01	4.83	24.51	6.9	24.38	27.18	20.69	5.25	23.02	12.62	8.64	8.61	3.95	2.75	31.4	34.99	148.67	71.44	24.45	16.34	12.55	6.23	12.76	10.76	25.72	16.42	13.47	7.75	14.24	13.8	27.95	13.5	13.49	18.93	37.2	7.14
Isistius brasiliensis	ZMH 108493		Atlantic	371	319	271	228	237	226	75.31	72.95	60.98	32.82	12.8	3.89	25.05	5.82	23.72	22.61	18.71	5.99	20.89	12.5	9.53	7.46	3.83	2.42	32.41	34.08	138.4	66.98	22.3	17.56	11.9	5.89	11.65	10.21	25.51	16.33	13.12	6.88	12.65	12.35	22.95	14.35	13.78	18.31	33.99	6.14
Isistius brasiliensis	ZMH 109456		Atlantic	386	319	279	224	248	232	82.43	80.23	66.18	34.73	14.63	5.86	23.98	7.86	24.15	28.01	22.58	5.52	22.04	13.95	9.15	8.54	3.49	2.52	36.04	35.51	131.88	68.51	25.56	18.57	13.99	6.64	13.17	10.2	28.48	21.26	16.26	8.91	14.23	14.38	28.18	17.68	13.8	21.06	39.85	11.62
Isistius brasiliensis	ZMH 109828		Atlantic	391	346	278	237	256	244	80.37	81.17	65.77	34.52	13.57	4.63	28.25	7.66	23.61	24.98	18.27	5.18	21.03	13.8	9.23	9.44	4.14	2.44	39.42	40.09	142.65	69.72	27.8	17	11.48	8.2	15.29	12.24	29.52	18.43	13.87	8.57	15.29	13.17	29.6	18.97	13.53	19.08	42.01	7.43
Isistius brasiliensis	ZMH 109991		Atlantic	262	213	178	149	157	149.17	50.6	51.27	42.61	22.82	10.44	4.64	17.95	5.05	16.88	18.44	10.76	3.51	16.17	10.5	6.98	5.7	2.58	1.94	19.06	25.6	87.87	46.18	17.71	13.43	8.69	3.39	9.64	5.93	19.3	13.61	11.39	4.35	9.13	8.52	20.02	13.05	9.15	9.7	20.59	4.6
Isistius brasiliensis	NHM 2000.2.24.13		No data	376	314	261	216	264	248	90.5	82.64	66.07	35.9	12.88	6.97	26.65	6.85	26.14	28.82	20.67	6.03	19.85	15.59	6.88	8.39	3.94	3.21	34.32	41.84	146.14	66.09	28.5	19.91	14.11	7.92	14.66	12.04	30.85	20.66	16.46	8.64	15.47	12.68	31.47	16.41	13.13	21.93	35.63	15.95
Isistius brasiliensis	NHM 1982.9.22.1 (1)		Atlantic	385	329	275	229	243	236	81.7	74.59	62.07	32.57	11.32	4.31	21.62	3.32	20.21	25.05	16.67	4.54	21.18	12.82	8.27	8.53	3.72	2.56	34.18	36.58	144.12	62.47	23.57	15.79	12.81	7.17	12.22	10.36	28.23	15.59	15.37	6.95	12.63	15.08	24.75	17.08	13.13	18.56	30.15	10.17
Isistius brasiliensis	NHM 1982.9.22.1 (2)		Atlantic	461	376	314	256	311	296	83.11	86.11	73.32	37.1	11.76	5.88	25.02	5.47	26.05	30.37	20.36	7.01	21.49	15.03	10.23	9.87	4.6	3.95	45.94	40.18	188	67.42	29.84	20.62	16.09	9.18	16.16	14.39	32.7	19.44	17.63	11.1	14.7	15.14	31.62	18.45	15.13	24.6	40.28	14.57
Isistius brasiliensis	NHM 1995.8.22.11		Atlantic	365	305	256	211	229	215	87.7	76.66	62.45	33.29	14.27	5.19	23.36	6.16	23.78	25.25	19.28	4.66	20.9	13.92	8.3	7.72	3.18	2.91	36.71	37.29	126.23	67.04	23.96	16.3	13.6	7.32	13.28	12.4	28.13	15.64	12.72	8.36	14.8	17.11	23.64	14.3	13.19	18.39	34.21	5.3
Isistius brasiliensis	NHM 1868.6.22.41		Pacific	-	-	-	-	-	144	47.56	48.62	41.04	22.17	7.46	2.62	15.94	3.77	14.42	19.7	12.84	3.52	14.82	9.58	5.51	4.14	1.82	1.53	19.95	24.56	-	40.29	15.23	11.14	7.15	3.47	8.25	6.52	17.49	10.99	9.05	4.44	10.04	8.57	15.16	10.43	8.1	9.16	17.06	5.22
Isistius brasiliensis	NHM 1998.8.9.12113		No data	-	-	-	-	-	-	73.96	75.53	62.58	34.6	14.01	6.56	26.51	6.57	22.74	24.58	17.7	5.55	22.04	13.34	8.4	6.86	3.9	2.45	29.45	36.59	135.52	66.43	25.02	20.37	11.89	6.28	12.95	11.03	26.58	18.5	14.25	7.38	15.31	14.04	27.52	17.28	13.61	16.13	41.07	9.42
Isistius brasiliensis	NHM 1996.7.10.29		Atlantic	427	364	306	262	277	261	85.42	86.08	67.76	35.52	15.44	5.6	28.37	6.92	22.31	27.74	28.37	5.3	21.21	13.61	8.74	9.5	3.59	2.62	33.4	37.98	164	62.53	30.81	20.48	17.05	7.35	14.6	15.19	32.1	20.54	17.45	7.85	16.17	16.81	32.04	19.75	14.25	20.5	36.22	15.68
Isistius brasiliensis	NHM 1996.9.11.10		Atlantic	393	338	286	237	254	235	80.03	82.59	67.89	35.17	13.05	7.03	27.35	6.25	24.7	28.21	22.1	5.77	22.05	14.45	9.56	7.96	4.37	3.23	35.47	36.94	143.01	66.31	27.63	21.42	14.5	6.39	14.15	11.2	28.45	23.28	16.18	8.16	14.51	13.75	31.04	18.78	13.49	20.27	44.82	9.43
Isistius brasiliensis	NHM 1997.5.21.56		Pacific	419	358	303	254	272	254	88.26	88.64	73.15	38.42	17.01	6.75	27.24	5.84	24.05	27.86	23.12	5.77	23.74	15.52	10.72	8.9	3.86	2.97	37.6	37.79	144	73.05	27.6	19.05	12.52	7.16	15.55	13.48	31.16	19.7	14.4	10.69	16.58	17.31	29.11	17.73	15.09	22.11	47.92	7.79
Isistius brasiliensis	NHM 1994.9.28.4		Atlantic	256	214	177	149	154	146	49.58	50.64	40.26	22.64	9.53	3.94	16.76	4.63	16.02	16.34	11.71	3.52	12.41	9.79	6.21	5.22	2.59	2.08	18.1	25.97	95.58	45.96	16.8	12.76	8.83	3.55	7.14	6.74	16.46	11.58	10.02	4.04	8.16	7.81	17.32	12.89	8.79	11.04	18.12	5.74
Isistius brasiliensis	NHM 1996.2.14.33		No data	427	359	305	247	286	272	88.9	88.91	73.46	37.42	15.86	6.29	29.27	6.51	28.58	27.75	22.26	6.21	23.64	14.91	10.07	10.13	3.85	3.32	40.94	39.34	162	70.69	28.8	21.13	13.13	7.4	16.05	13.04	31.94	21.13	16.43	9.63	17.45	17.2	33.77	21.44	16.63	25.17	41.33	16.19
Isistius brasiliensis	MNHN 0000-1178	H	Indian	471	404	343	285	304	288	94.62	96.38	77.52	37.23	13.63	6.75	24.07	8.31	27.07	41.8	29.13	6.57	21.11	16.89	10.48	10.66	3.3	3.26	44.88	45.03	178	72.63	30.23	18.51	13.56	8.97	17.63	15.69	32.13	15.26	15.07	8.92	17.23	21.01	27.04	21.14	18.9	18.69	37.74	15.27
Isistius brasiliensis	MNHN 0000-1179		Atlantic	210	175	146	119	125.81	119.91	41.19	42.06	34.65	19.28	6.63	3.14	14.15	3.65	15.71	20.01	10.44	2.56	11.6	10.59	3.56	3.98	2.22	1.18	19.74	24.06	76.32	37.25	9.06	6.69	5.76	3.28	2.83	3.02	7.84	7.42	6.62	3.38	2.45	4.52	14.27	6.2	8.33	5.64	12.73	4.27
Isistius brasiliensis	MNHN 0000-4891		Atlantic	209	176	148	126	132	123	42.69	45.24	37.19	19.83		7.18	15.05	3.44	14.28	15.85	9.76	2.83	11.59	9.42	5.62	4.37	1.32	1.26	17.35	23.36	72.65	36.8	14.19	9.39	6.46	3.65	7.72	6.53	15.29	8.89	7.37	4.05	6.78	7.55	18.05	9.98	8.13	9.86	16.38	7.13
Isistius brasiliensis	MNHN 1987-1306		Pacific	-	-	-	-	-	-	-	-	-	-	-	-	-	-	24.81	26.51	22.46	-	23.04	13.37	9.85	9.95	5.56	4.18	33.16	39.85	-	70.03	27.54	21.25	14.39	7.08	16.44	11.84	31.11	21.8	16.72	8.71	15.9	12.66	34.16	19.28	18.04	19.6	41.11	7.16
Isistius brasiliensis	MNHN 1991-6827		Atlantic	-	-	-	-	-	-	-	-	-	-	-	-	-	-	20.59	28.06	20.87	-	23.19	14.28	8.25	9.4	3.89	2.37	30.84	38.44	135.59	62.63	27.74	19.51	14.61	6.41	13.77	11.32	28.89	19.65	15.73	7.79	13.95	14.57	28.36	15.04	13.97	20.65	38.01	6.7
Isistius brasiliensis	MNHN 1996-0464		Pacific	413	349	296	248	264	253	83.27	85.38	69.98	35.22	13.88	7.12	27.53	8.91	25.15	26.98	18.78	6.21	23.43	15.23	9.81	8.27	2.14	2.51	34.01	41.91	153.74	64.48	27.48	21.25	15.36	8.46	12.51	10.86	28.92	19.01	15.65	8.45	13.73	12.71	30.09	16.13	15.21	20.9	39.58	8.87
Isistius brasiliensis	MNHN 1996-0465		Pacific	409	347	289	246	258	246	78.35	82.92	67.09	36.01	14.1	6.54	26.56	7.67	23.37	26.18	20.57	5.65	22.22	15.28	10.36	8.07	3.08	2.77	35.97	42.77	148.46	62.63	25.82	17.08	11.98	6.58	13.93	12.13	28.06	16.22	14.92	7.95	13.91	16.15	30.19	16.36	13.64	19.96	39.8	10.24
Isistius brasiliensis	MNHN 1996-0725		Pacific	-	-	-	-	-	-	84.28	87.56	69.39	35.64	14.23	5.52	25.98	8.04	22.73	27.23	26.37	5.71	23.75	14.74	9.7	8.37	3.18	2.85	33.44	41.16	-	72.51	27.78	18.89	14.8	6.47	13.47	8.74	29.24	18.63	14.81	7.65	13.94	14.75	28.49	17.04	14.21	20.08	40.81	10.52
Isistius brasiliensis	MNHN 1996-0726		Pacific	-	-	-	-	-	-	-	-	-	-	14.68	5.57	26.17	9.23	23.13	23.97	20.15	6.25	22.68	15.09	9.54	9.62	4.27	3.09	37.35	41.07	-	68.27	29.05	21.83	14.17	7.26	15.96	11.89	30.16	21.26	14.54	7.04	14.58	15.11	31.59	14.7	13.48	21.37	41.18	9.35
Isistius brasiliensis	MNHN 1996-0727		Pacific	-	-	-	-	-	-	-	83.16	65.05	34.16	15.81	4.94	22.78	6.16	20.12	27.03	25.3	6.55	22.56	13.21	9.25	8.36	3.25	2.54	41.58	37.72	-	66.24	24.3	17.88	12.09	6.56	13.09	11.1	26.35	16.52	13.54	8.37	14.16	14.71	27.5	16.25	13.95	21.51	37.12	8.06
Isistius brasiliensis	MNHN 1996-0728		Pacific	-	-	-	-	-	-	73.87	79.91	64.47	32.29	12.19	5.46	24.37	5.62	23.27	23.99	19.55	4.73	21.93	14.68	8.66	7.89	2.9	1.78	33.77	38.69	141.99	73.72	27.25	20.48	13.02	4.83	13.07	10.75	27.38	17.5	15.42	7.88	12.67	14.18	31.05	15.46	12.1	17.62	40.44	6.88
Isistius brasiliensis	MNHN 1996-0892		Pacific	206	175	147	123	127	121	40.49	42.93	36.57	18.6	7.01	-	12.66	-	14.46	14.76	11.08	-	11.52	9.53	6.2	4.87	1.77	1.53	15.95	22.2	69.99	36.8	15.47	11.6	7.04	3.37	7.49	6.02	15.58	10.47	8.53	3.76	5.77	7.47	18.34	9.71	9.69	10.97	18.7	4.73
Isistius brasiliensis	MNHN 1997-3574		Pacific	480	398	337	276	312	299	83.72	86.53	70.78	36.66	12.17	5.21	26.49	7.01	27.48	29.91	24.47	6.32	26.65	16.1	12.02	9.09	4.21	3.1	40.53	45.38	193	78.94	32.4	22.57	17.35	9.32	16.14	15.44	34.08	24.48	18.42	9.92	15.5	14.95	33.08	19.75	17.09	20.72	38.2	15.73
Isistius brasiliensis	MNHN 1997-3575		Pacific	-	-	-	-	-	-	-	-	-	35.03	13.51	6.71	26.53	8.17	22.57	29.05	23.97	5.24	23.57	12.87	10.75	10.52	3.37	3.1	37.23	40.14	138	70.2	25.75	21.65	11.53	7.55	15.42	9.12	29.3	18.55	14.41	9.09	16.53	13.47	29.97	16.63	12.31	22.17	39.01	7.28
Isistius brasiliensis	MNHN 1997-3576		Pacific	-	-	-	-	-	-	-	-	-	33.69	12.25	5.04	22.79	5.68	22.46	26.51	21.81	5.02	21.49	13.59	8.95	8.25	4.09	3.1	35.62	36.4	158	70.03	25.43	18.72	12.93	6.25	12.57	10.16	26.32	17.32	14.6	6.69	12.39	13.35	27.42	15.74	13.45	18.05	39.31	9.39
Isistius brasiliensis	MNHN 1997-3577		Pacific	266	225	189	159	168	158	54.09	55.38	45.38	24.16	9.67	2.58	17.06	4.7	16.11	20.39	14.99	2.86	15.87	10.92	7.76	6.57	2.75	2.22	21.23	24.44	97.21	46.37	19.29	13.73	10.01	4.93	8.68	8.56	20.06	12.08	11.38	5.57	9.47	10.53	20.06	10.69	9.14	14.68	24.86	6.11
Isistius brasiliensis	MNHN 1997-3578		Pacific	178	247	123	103	111	104	36.19	38.26	30.1	16.46	5.58	2.16	11.72	2.75	12.58	13.04	10.27	2.66	9.45	8.01	5.46	4.4	1.32	1.08	13.31	18.22	59.91	30.81	12.4	9.34	6.52	2.54	6.36	6.37	14.55	8.81	8.09	4.01	6.81	5.53	15.65	8.84	6.26	8.07	14.26	3.45
Isistius brasiliensis	MNHN 1997-3579		Pacific	172	146	124	102	99	94	37.03	39.02	32.19	17.23	5.98	2.8	11.5	3.09	9.74	15.2	9.3	2.5	10.34	8.5	5.03	3.84	1.97	1.68	15.47	16.51	53.96	30.83	10.93	7.82	6.31	3.07	4.84	5.83	10.14	8.07	6.36	3.24	4.39	5.49	14.53	7.82	7.63	8.56	13.76	3.3
Isistius brasiliensis	MNHN 1997-3580		Pacific	275	234	193	158	181	176	52.86	54.74	45.09	23.24	7.66	4.1	15.95	4.5	13.17	21.35	16.69	3.7	14.03	9.99	7.49	6.34	2.81	2.63	25.33	28.84	100.43	47.27	18.47	13.26	9.48	4.67	9.34	9.17	19.74	11.65	10.15	5.32	9.91	9.75	21.23	14.72	9.2	10.39	23.9	8.08
Isistius brasiliensis	MNHN 1997-3581		Pacific	-	-	-	-	-	-	-	-	-	36.56	14.68	6.36	28.31	9.04	29.12	26.39	20.08	5.85	21.31	15.03	9.57	8.11	3.67	2.64	35.79	41.6	127.59	67.43	-	-	-	-	-	-	32.26	19.86	15.72	9.41	15.95	17.6	32.27	12.13	12.06	24.92	39.11	9.48
Isistius brasiliensis	MNHN 1997-3739		Pacific		217	179	150	156	151	51.52	52.11	42.83	22.45	8.45	2.41	14.52	3.36	16.35	18.25	14.09	3.05	14.11	10.43	6.85	5.41	2.56	2.02	19.94	26.44	92.91	49.04	17.04	12.34	8.61	4.23	8.2	7.34	19.52	12.62	10.63	5.2	8.95	9.14	21.81	101	9.08	12.96	22.53	5.97
Isistius brasiliensis	MNHN A-7787	H	Atlantic	172	133.35	109.76	90.05	97.89	95.41	34.46	35.11	28.71	15.1	4.87	2.29	11.08	2.46	19.19	17.08	8.04	2.79	8.36	7.69	4.44	4.01	1.51	1.25	15.19	21.48	53.24	28.73	9.98	7.16	5.33	2.55	3.84	4.15	9.07	8.24	5.99	2.49	2.7	3.99	10.04	7.28	7.66	4.14	9.27	3.63
Isistius brasiliensis	NRM 9026		Atlantic	-	-	-	-	-	-	34.71	37.89	31.16	16.08	5.52	2.69	11.52	3.15	11.67	19.9	9.07	2.41	10.66	8.53	4.61	3.84	2.31	1.09	17.26	19.34	-	31.43	10.96	10.1	6.28	2.67	4.37	3.52	11.88	9.19	7.39	2.34	4.99	3.89	14.27	6.24	7.6	5.94	10.67	3.18
Isistius brasiliensis	ASIZP 0059802		Pacific	411	355	297	253	264	252	77.03	83.04	67.42	37.16	14.6	5.34	28.02	7.52	19.11	26.94	25.23	5.91	21.24	14.34	7.99	7.92	3.78	2.43	36.01	40.17	154.09	76.5	25.45	18.8	11.67	6.46	14.47	10.59	29.04	19.14	14.89	8.99	14.41	14.92	28.4	17.79	13.93	18.15	41.06	17.34
Isistius brasiliensis	FRIP 00573		Pacific	299	254	214	181	191	183	60.6	62.19	49.3	25.22	8.55	3.82	18.97	5.12	18.65	22.61	13.7	4.98	16.19	11.23	7.16	7.11	3.2	1.4	25.54	32.05	108.24	50	18.77	13.71	9.01	6.01	8.96	8.09	20.14	13.66	10.86	5.73	10.48	11.19	23.36	13.38	11.15	13.87	21.85	7.67
Isistius brasiliensis	FRIP 00573 (F33)		Pacific	421	353	296	244	271	256	87.22	87.81	70.97	37	13.94	6.07	29.51	7.78	29.36	31.85	15.88	5.84	20.53	14.83	8.44	8.51	3.08	2.82	40.7	44.07	148.78	67.42	25.91	19.7	12.69	7.57	14.97	11.21	27.3	18.45	13.96	9.31	14.7	14.66	31.92	16.59	13.92	20.4	41.03	21.15
Isistius brasiliensis	FRIP20508		Pacific	459	387	340	287	313	298	92.96	93.15	75.59	39.32	13.46	5.68	29.27	6.12	23.46	32.16	26.46	6.01	24.06	16.12	11.69	8.26	4.39	4.55	41.72	49.51	182.75	78.48	28.15	21.59	15.3	8.69	14.18	10.84	33.54	21.98	16.57	11.05	15.5	16.8	33.83	21.24	15.91	24.41	37.13	14.85
Isistius brasiliensis	FRIP22956		Pacific	502	414	355	309	308	299	93.6	95.28	77.22	39.78	15.14	5.5	30.51	7.1	27.58	31.2	23.52	5.78	24.24	15.36	11.18	9.93	4.49	3.15	38.72	43.45	187.67	83.1	32.8	23.15	13.88	8.83	18.67	16.16	36.04	20.49	18.17	8.71	18.84	17.37	39.26	19.75	18.91	23.96	45.99	15.1
Isistius brasiliensis	UERJ 1660.1		Pacific	420	366	313	262	280	273	85.5	83.92	66.44	35.24	11.3	4.38	24.27	4.73	27.77	33.07	17.91	4.87	20.67	13.63	8.47	6.8	3.85	3.04	40.87	42.58	164.95	66.73	25.29	19.4	13.69	8.64	14.02	8.44	23.19	16.93	14.73	7.17	11.85	10.47	26.84	18.35	14.98	16.61	31.71	13.24
Isistius brasiliensis	UERJ 1635		Atlantic	-	-	-	-	-	-	-	-	-	-	-	-	-	-	-	-	-	-	-	-	-	-	-	-	38.15	40.89	151.83	72.91	24.07	17.97	12.49	5.94	11.18	10.14	27.58	19.23	15.55	8.26	11.21	10.83	24.77	13.07	11.37	17	40.85	8.07
Isistius brasiliensis	UERJ 1671		Atlantic	431	364	31	256	282	277	88.5	87.19	70.11	37.52	12.02	4.35	24.09	4.63	27.42	33.67	17.16	6.66	23.41	14.12	8.99	7.93	3.59	4.78	-	47.33	164.23	68.56	-	-	-	-	-	-	30.74	20.4	14.56	8.33	16.88	16.54	28.34	19.73	14.69	20.78	37.67	13.2
Isistius brasiliensis	UERJ 1636.3		Atlantic	113.85	101.37	82.74	70.36	76.09	72.69	24.16	24.89	19.93	10.94	3.08	0.83	6.5	1.16	10.39	10.51	5.69	1.44	6.34	5.77	3.68	2.64	1.34	0.75	10.33	14.57	45.69	21	4.86	4.68	3.53	2.77	2.03	2.26	7	4.19	4.14	2.01	2.84	3.26	6.65	4.18	3.24	4.97	7.46	2.95
Isistius brasiliensis	UERJ 1636.6		Atlantic	114.32	99.55	83.2	70.48	74.23	73.6	24.17	25.51	20.43	10.5	3.81	1.54	7.96	1.25	8.92	9.64	6.73	1.58	6.24	5.05	2.88	1.87	1.17	1.1	8.93	13.31	44.22	21.84	6.29	4.3	4.2	2.13	2.39	2.75	6.64	4.35	4.97	1.47	2.08	2.19	6.19	4.07	3.2	6.9	6.21	3.01
Isistius brasiliensis	UERJ 1636.8		Atlantic	112.14	97.83	82.53	69.04	74.87	69.29	24.68	25.08	20.59	10.69	3.09	1.11	7.5	1.35	8.38	9.64	5.82	1.75	6.27	5.76	3.1	2.06	1.52	1.15	9.42	11.35	40.04	20.08	4.89	3.16	3.57	2.44	2.57	3.48	8.16	3.98	4.56	2.17	3.61	3.92	7.03	4.94	4.31	4.89	8.01	3.1
Isistius brasiliensis	UERJ 1636.7		Atlantic	117.98	103.71	89.29	75.88	80.31	77.48	30.45	-	-	-	3.85	-	9.71	-	-	10.42	-	-	6.71	6.44	4.55	-	-	-	10.23	11.93	43.75	21.56	5.83	4.88	3.65	1.99	2.82	2.49	6.11	4.54	4.78	1.99	1.61	2.66	9.29	4.89	3.74	7.57	8.09	4.47
Isistius brasiliensis	UERJ 1636.2		Atlantic	116.02	102.65	85.81	73.02	77.36	72.13	26.63	26.71	20.89	11.01	3.18	1.11	8.32	1.43	10.05	10.08	6.94	1.79	6.21	5.47	3.22	2.34	1.3	0.6	9.79	13.12	44.19	23.18	6.13	4.57	4.51	2.3	2.73	3.39	6.16	4.43	5.11	1.61	1.96	3.56	7.05	3.43	3.66	6.55	5.6	2.71
Isistius brasiliensis	UERJ 1636.1		Atlantic	120.71	107.69	94.12	77.98	84.37	80.13	26.73	28.25	-	-	-	-	-	-	-	-	-	-	-	-	-	-	-	2.19	11.09	9.19	48.84	20.7	6.97	5.69	4.72	2.05	2.92	3.74	6.35	4.49	4.89	2.48	2.89	2.74	10.85	7.19	5.49	5.78	7.61	4.59
Isistius brasiliensis	UERJ 1636.4		Atlantic	118.9	102.26	88.59	74.06	79.83	75.79	27.4	-	-	-	-	-	-	-	-	-	-	-	-	-	-	-	-	-	9.73	12.73	45.45	21.74	6.46	4.38	4.57	2.31	2.85	3.7	6.88	4.91	5.1	1.51	3.56	3.37	8.08	6.07	4.74	7.43	3.44	2.74
Isistius brasiliensis	UERJ 1636.5		Atlantic	115.76	104.27	85.76	71.74	78.74	74.83	25.27	27.1	21.84	11.44	4.14	-	9.05	-	6.43	8.58	7.99	-	6.51	4.57	2.87	1.81	1.24	1.11	11.09	15	45.67	23.02	5.92	4.13	3.51	2.68	2.84	2.92	6.54	3.5	4.23	2.18	2.21	2.97	6.86	4.98	4.6	7.68	3.37	2.4
Isistius brasiliensis	SAIAB 64998		Atlantic	405	345	290	245	262	256	82.6	84.9	68.8	35.4	14.4	7.2	31.4	-	24.2	28.7	12.2	5.6	19.8	14.9	8.9	8.2	3.5	3	32.2	37.4	160	69.7	26.2	20.2	13.3	14.2	12.3	11.8	27.8	18.7	14.9	15.4	12.5	14.9	34.7	22.6	12.2	18.9	35.7	-
Isistius brasiliensis	SAIAB 65007		Atlantic	395	335	280	230	250	240	81.2	81.9	63.5	33.6	13.7	7.9	29.6	-	20.8	25.2	13.7	5.4	19.8	15.3	9.3	9.6	2.8	3.3	32.9	40.2	142	76.5	27.6	20.4	15.2	11.9	14.3	11.9	31.3	19.5	18.9	12.5	14.6	15.4	32.8	21.7	11.8	20.8	42.4	-
Isistius brasiliensis	SAIAB 65972		Atlantic	288	243	205	172	186	179	61.7	63.9	49.8	28.2	10.3	5.5	22.3	-	7.2	19.8	6.6	3.5	15.4	11.2	7.7	5.9	2.8	2.3	25.4	29.3	104.7	47.4	18.4	12.8	9.5	9.2	9.2	9.8	20.6	14.3	11.2	10.6	9.8	9.2	26.7	16.7	9.5	12.7	20.6	-
Isistius brasiliensis	NSMT P73397		Pacific	512	428	367	308	340	323	100.36	102.11	83.51	41.94	16.07	6.6	35.08	8.07	29.13	37.06	28.53	6.99	23.98	17.76	11.46	9.58	5.06	3.52	38.39	45.74	202	88	32.86	24.5	16.42	9.47	17.33	13.94	37.57	22.87	16.86	11.07	19.75	18.65	41.13	20.68	21.44	21.13	42.1	20.1
Isistius brasiliensis	NSMT P32254		Pacific	406	347	288	242	266	249	83.52	85.93	57.91	35.77	13.69	5.5	27.89	8.11	23.59	29.45	19.36	5.29	21.54	14.37	9.53	7.17	4.62	3.26	33.9	36.98	156.4	70.93	28.27	21.1	15.27	8.56	13.59	12.52	31.34	22.15	16.02	8.78	15.49	16.61	29.87	17.92	13.96	17.33	41.3	6.83
Isistius brasiliensis	NSMT P81443		Pacific	172	148	126	107	114	105	37.96	39.35	31.1	17.58	5.65	1.82	14.64	2.89	13.04	12.13	10.2	2.87	9.75	8	5.04	3.83	2.41	1.55	16.65	18.59	65.6	30.98	11.07	9.04	5.56	2.69	5.4	3.97	12.02	8.72	6.26	3.32	6.6	6.05	15.21	8.41	7.24	10.04	15.73	5.39
Isistius brasiliensis	NSMT 44318		Pacific	476	410	342	285	315	295	90.8	95.03	77.56	39.92	14.87	5.84	30.63	7.19	27.35	30.8	20.72	5.96	23.28	15.64	12.09	8.78	5.51	4.45	40.46	49.89	187.84	77.01	29.01	24.01	16.98	6.28	13.66	12.24	26.24	18.71	15.94	7.89	11.71	11.76	30.01	17.45	18.25	18.31	36.87	17.62
Isistius brasiliensis	NSMT P44321		Pacific	504	430	367	308	339	318	94.2	98.89	79.54	41.42	15.79	6.54	34.83	7.39	31.37	31.39	21.41	6.6	27.26	16.41	12.21	8.21	4.71	4.36	43.12	46.2	202.67	78.09	30.65	21.46	15.48	8.16	16.37	14.1	33.02	21.18	17.64	10.49	16.7	17.12	33.71	18.56	15.95	16.55	41.57	20.38
Isistius brasiliensis	NSMT P44315		Pacific	479	406	344	290	310	299	90.91	95.75	77.22	39.73	14.6	4.53	33.41	7.28	30.84	32.73	21.2	6.8	27.46	16.51	11.78	9.11	5.32	3.42	41.16	43.66	184.83	80.02	33.18	24.13	13.31	9.91	19.7	16.72	35.53	21	15.19	10.08	20.64	20.56	34.7	21.87	16.88	22.81	42.19	16.99
Isistius brasiliensis	NSMT P44320		Pacific	465	391	332	275	294	283	85.05	88.1	73.23	39.45	16.38	6.47	29.61	8.13	27.63	31.22	22.88	7.12	22.49	15.9	11.55	8.23	4.14	3.69	45.68	51.77	178.21	84.1	27.29	20.35	13.21	7.82	16.66	12.45	29.55	17.82	13.22	12.07	17.38	16.63	30.46	20.61	15.9	18.36	38.29	16.52
Isistius brasiliensis	NSMT P44319		Pacific	482	404	344	284	319	301	90.52	94.07	75.61	39.35	13.59	5.52	30.33	5.58	30.61	31.2	24.36	6.65	25.05	16.56	12.44	9.13	5.32	4.89	45.75	38.99	181.97	80.81	31.62	24.02	14.34	8.22	16.71	13.54	34.05	22.6	17.5	10.95	18.14	18.6	36	19.9	17.08	21.43	42.94	20.45
Isistius brasiliensis	NSMT P44316		Pacific	471	408	347	294	322	306	93.52	98.99	80	41.44	15.92	6.25	32.7	5.62	31.11	34.12	20.8	6.93	28.63	17.5	13.46	8.22	5.39	4.6	40.63	44.22	189.77	80.12	28.18	19.6	14.09	7.55	14.16	12.26	29.28	16.5	14.98	9.59	14.89	17.48	30.64	13.95	17.01	19.81	35.1	16.2
Isistius brasiliensis	NSMT P57418		Pacific	446	380	322	272	295	277	87.33	87.2	70.05	38.51	14.86	5	31.99	7.29	25.77	29.7	23.73	7.14	22.54	15.41	11.18	8.77	4.99	4.25	38.44	41.97	173.42	69.57	29.23	20.15	13.94	7.76	15.45	13.34	32.71	18.81	16.04	9.37	16.29	18.61	29.05	18.84	14.74	19.7	37.81	17.78
Isistius brasiliensis	NSMT P44152		Pacific	458	382	334	275	309	295	90.3	92.72	74.45	37.8	14.59	6.48	31.81	8.29	27.11	32.07	21.77	6.03	23.31	15.38	12.55	9.42	6.14	4.86	42.21	39.38	180.07	66.21	33.26	18.8	15.95	9.64	17.35	19.41	35.09	16.82	15.1	9.68	20.28	21.36	35.03	20.72	16.7	23.34	41.77	18.78
Isistius brasiliensis	NSMT P34498		Pacific	480	402	344	291	308	287	89.75	92.84	76.56	38.58	14.19	4.73	30.16	5.56	29.47	36.4	21.61	5.58	22.39	16.05	11.31	9.64	4.33	4.02	40.55	41.56	190.79	76.86	28.58	21.4	14.99	9.11	15.62	13.01	33.51	20.3	17.21	8.69	16.92	18.04	36.93	16.12	18.85	16.34	35.86	17.1
Isistius brasiliensis	CBM-ZF 0007745		Pacific	169	141	116	106	110	102	38.63	39.12	31.71	17.35	5.52	2.09	13.25	2.44	13.4	13.21	5.8	2.88	9.52	7.96	5.02	3.15	2.14	0.78	12.73	17.19	57.09	31.14	12.56	7.95	6.68	2.41	6.27	6.25	12.93	6.99	5.76	3.4	5.94	8.35	14.6	7.93	6.16	9.35	15.25	5.88
Isistius brasiliensis	NSMT P0102385		Pacific	262	224	186	155	162	154	52.29	53.88	43.83	24.33	8.85	3.19	19.14	3.91	18.545	17.87	11.38	3.56	14.22	10.29	7.07	4.61	2.69	1.15	24.77	29.2	99.92	48.04	17.13	11.42	7.21	4.91	8.59	7.01	20.87	10.75	11.92	4.58	10.57	11.09	20.92	11.1	9.32	11.4	21.42	7.56
Isistius brasiliensis	HUMZ 126958		Pacific	421	360	291	245	265	257	81.27	80.24	65.85	34.61	12.62	5.04	26.89	6.93	24.25	25.88	20.26	5.53	22.8	13.43	8.4	7.14	4.41	4.24	33.83	43.17	151.37	73.52	28.29	19.98	14.58	7.53	13.74	13.15	32.25	21.96	18.9	7.48	13.94	13.43	27	11.86	15.72	18.13	32.93	13.22
Isistius brasiliensis	HUMZ 86586		Pacific	505	425	356	299	330	315	92.55	94.86	78.76	40.01	13.69	5.59	31.28	6.62	26.17	32.01	27.89	5.9	23	17.06	10.55	8.27	6.38	3.76	40.27	49.49	198.99	83.93	30.24	19.75	15.41	8.96	16.39	16.04	34.05	20.3	14.9	11.13	16.16	19.08	32.83	15.95	18.15	20.3	40.42	16.54
Isistius brasiliensis	HUMZ 177913		Pacific	410	352	295	253	260	250	83.58	85.24	67.63	36.61	13.77	5.4	27.78	7.32	26.46	27.1	19.43	5.42	21.29	12.77	9.4	7.84	4.76	3.1	35.06	40.73	154.7	70.66	26.69	20.37	14.2	7.02	13.14	11.04	28.43	15.54	13.28	8.35	14.69	14.08	28.83	12.93	13.87	18.39	39.12	10.23
Isistius brasiliensis	HUMZ 126957		Pacific	-	-	-	-	-	-	-	86.39	73.69	39.3	13.75	5.4	29.72	6.43	24.56	36.23	23.8	5.36	22.74	15.97	9.53	8.53	4.69	3.83	41.66	32.68	-	-	-	-	16.53				33.61	-	16.49	-	-	-	-	-	16.87	-	-	-
Isistius brasiliensis	HUMZ 124775		Pacific	405	343	290	240	254	245	82.37	82.13	64.69	34.99	12.08	5.1	25.63	6.03	25.41	30.98	20.38	5.37	21.49	15.14	10.67	8.35	4.86	3.88	41.96	38.7	150	74.21	25.57	20.93	11.93	7.07	13.67	11.52	27.71	17.42	12.83	9.68	15.23	16.26	27.87	14.29	13.03	19.62	39.42	9.07
Isistius brasiliensis	HUMZ 208882		Pacific	224	185	153	128	136	130	48.35	48.67	41.02	22.4	7.4	2.86	26.32	3.89	16.16	18.56	15.47	3.2	11.55	11.37	6.05	4.65	3.11	2.34	21.13	26.03	75.79	44.99	12.59	7.92	6.81	3.65	7.19	7.93	14.97	9.1	8.03	4.5	7.8	8.5	15.33	8.58	7.5	8.69	16.89	3.47
Isistius brasiliensis	HUMZ 211104		Pacific	486	412	355	298	311	301	94.03	94.04	77.66	38.81	14.83	6.18	31.9	7.32	28.66	31.47	22.84	6.31	26.02	16.33	10.3	10.68	5.65	4.63	42.72	39.44	188.82	77	32.62	27.15	16.1	9.02	16.18	13.37	37.91	24.2	19.23	9.36	18.15	18.58	38.59	16.62	19.09	20.67	40.95	15.64
Isistius brasiliensis	HUMZ 126959		Pacific	-	-	-	-	-	-	-	83.23	66.64	34.76	14.38	5.42	27.54	6.56	21.91	28.05	19.4	5.15	17.81	14.42	8.35	6.58	3.86	3.07	-	-	-	-	-	-	-	-	-	-	-	-	-	-	-	-	-	-	-	-	-	-
Isistius brasiliensis	HUMZ 126961		Pacific	-	-	-	-	-	-	-	68.77	56.44	29.75	9.69	4.46	24.28	5.73	19.09	25.09	22.27	4.27	17.28	12.71	7.12	6.16	3.51	2.38	-	-	-	-	-	-	-	-	-	-	-	-	-	-	-	-	-	-	-	-	-	-
Isistius brasiliensis	HUMZ 126962		Pacific	475	408	335	280	305	294	91.91	94.79	76.18	39.53	14.39	5.79	30.5	7.05	26.59	34.08	23.58	7.04	19.97	15.05	10.56	8.87	-	-	45.05	47.43	187.7	71.13	32.17	23.91	16.37	7.7	15.56	15.49	32.77	21.2	16.56	9.43	16.22	18.06	37.23	19.89	16.6	22.46	41.45	16.76
Isistius brasiliensis	HUMZ 126960		Pacific	385	323	268	221	243	238	78.06	81.84	63.17	33.34	12.13	5.1	27.72	6.45	22.04	24.16	19.56	6.11	16.42	13.02	9.02	7.03	3.68	2.89	32.42	39.1	139.19	71.41	27.14	20.11	15.15	7.79	12.87	13.7	32.67	21.01	15.33	8.02	16.08	13.06	29.44	13.46	13.97	18.35	44.1	7.86
Isistius brasiliensis	HUMZ 141846		Pacific	420	360	305	255	280	260	83.17	85.16	70.28	36.73	15.73	5.39	28.04	6.23	27.67	28.13	21.04	6.18	23.29	14.74	9.79	9.52	5.09	3.39	41.48	38.66	167.82	73.36	28.35	22.2	12.83	5.79	13.89	11.7	31.81	19.51	14.13	9.84	15.06	15.71	35.53	18.87	17.52	20.52	39.13	9.09
Isistius brasiliensis	HUMZ 89900		Pacific	520	445	378	317	340	326	95.24	97.04	78.22	41.3	13.72	7.03	31.36	8.27	-	34.47	-	5.77	23.81	15.68	11.25	9.58	5.33	3.76	46.66	52.56	214	93.61	34.36	23.91	15.05	8.5	17.92	15.73	34.75	20.33	15.56	9.72	19.64	20.79	37.91	15.87	19.76	20.01	41.14	23.65
Isistius brasiliensis	HUMZ 141845		Pacific	445	381	318	277	295	282	82.32	87.19	70.07	36.77	13.07	5.91	27.32	6.07	25.56	30.48	21.22	5.58	21.35	15.58	9.88	8.77	4.4	3.98	37.56	45.96	170.47	77.37	26.97	21.11	12.78	7.82	14.19	12.74	32.35	19.6	15.44	8.27	16.26	16.6	36.3	20.15	13.42	21.14	34.86	14.22
Isistius brasiliensis	HUMZ 203771		Pacific	450	380	323	264	295	277	85.35	89.4	72.3	36.68	14.17	4.7	27.89	4.65	23.56	32.25	23.54	5.6	25.54	13.91	10.42	9.22	4.29	4.18	45.17	39.77	170.59	70.75	33.17	24.27	14.44	9.96	18.01	14.67	32.9	22.1	14.64	8.91	18.39	15.17	40.81	18.47	16.54	23.9	44.17	16.9
Isistius brasiliensis	HUMZ 69173		Pacific	372	310	258	217	240	234	81.17	79.95	64.81	32.62	11.96	5.4	22.53	6.34	20.93	30.92	18.98	5.18	14.74	13.43	9.53	9.52	3.5	2.68	33.18	38.79	142.33	65.43	23.78	18	11.69	6.85	11.5	10.63	24.28	14.71	10.9	7.1	12.72	12.46	30.37	9.42	15.38	19.37	30.2	10.28
Isistius brasiliensis	HUMZ 87120		Pacific	447	383	325	273	302	285	84.74	87.33	70.17	36.7	14.2	4.65	30.42	6.85	26.65	28.83	21.01	5.56	21.86	13.79	11.08	9.03	6.53	4.76	38.5	44.59	176.32	75.77	27.73	18.32	12.41	9.27	15.15	16.32	30.81	18.85	15.37	8.65	15.98	19.52	29.72	19.03	15.81	22.57	35.12	13.68
Isistius brasiliensis	AM I.42058-001		Pacific	255	215	177	148	161	152	51.86	51.3	41.59	19.83	6.84	1.24	15.53	0.99	13.59	17.32	12.36	1.92	12.97	8.52	5.61	3.83	1.85	0.88	22.8	28.33	87.37	45.99	-	11.77	7.57	4.28	7.87	6.31	16.65	11.13	8.95	3.37	8.32	8.26	20.79	7.86	7.11	12.21	22.08	4.12
Isistius brasiliensis	AM I.24161-002		Pacific	358	298	251	214	234	221	77.95	76.54	61.24	31.22	11.31	4.14	24.55	4.9	22.79	27.61	17.78	4.66	18.4	13.53	9.38	7.24	4.63	3.68	26.69	31.29	129.14	57.09	21.67	18.45	9.28	5.61	11.93	9.73	24.58	16.74	12.12	7.44	11.89	10.54	28.04	14.82	12.9	13.02	27.99	11.58
Isistius brasiliensis	AM I.43092-001		Pacific	395	337	282	231	268	251	83.27	84.78	68.3	35.87	13.83	5.94	26.97	7.92	24.49	27.58	19.15	5.59	23.45	14.25	9.3	7.89	4.55	4.01	40.67	44.4	144.8	69.75	25.93	17.47	13.07	7.26	12.27	11.97	27.71	17.31	13.95	9.5	13.57	16.32	29.46	15.85	12.54	18.64	44.11	9.09
Isistius brasiliensis	AM I.42038-001		Pacific	370	320	265	222	229	223	82.43	81.77	66.55	35.44	13.93	4.94	26.48	6.46	23.4	27.09	22.08	5.16	20.85	14.34	9.8	9.1	4.79	3.82	40.02	46.64	122.22	76.91	23.64	18.29	10.32	6.52	12.24	9.45	26.62	18.88	13.94	8.13	13.78	14.59	29.9	16.24	14.73	18.38	43.82	8.8
Isistius brasiliensis	AM I.43094-001		Pacific	362	304	254	214	232	224	74.41	75.18	61.66	32.12	11.18	3.89	25.22	4.79	23.8	26.09	15.58	4.52	19.91	13.41	10.14	7.8	4.06	3.37	34.24	39.13	126.4	64.98	22.88	17.77	10.84	6.24	13.26	10.83	27.11	17.63	13.18	7.34	14.79	14.24	29.49	16.02	12.88	18.53	36.42	10.88
Isistius brasiliensis	AM I.27639-002		Pacific	393	328	271	225	251	228	79.33	80.9	64.59	30.97	10.76	-	25.07	-	26.4	27.27	19.96	-	22.14	14.13	10.12	8.66	5.09	2.59	35.77	40.4	136.26	68.69	27.27	20.85	13.31	6.02	14.27	9.61	26.83	19.83	13.18	6.64	14.76	12.17	30.87	13.13	15.47	18.42	42.45	7.47
Isistius brasiliensis	AM I.42003-004		Pacific	238	197	161	133	149	142	50.1	49.55	40.4	21.6	7.61	3.43	16.32	3.18	15.39	18.49	13.67	3.79	13.37	10.25	7.25	5.64	2.87	2.02	25.03	26.47	78.69	47.51	16.51	12.83	5.97	4.4	8.7	7.37	17.96	10.46	8.32	5.45	9.31	8.67	21.05	13.07	8.99	11.77	20.44	5.04
Isistius brasiliensis	AM I.29996-001		Pacific	191	162	133	111	123	118	41.2	41.73	34.61	19.04	6.16	2.1	13.01	1.34	14.39	13.81	9.62	2.53	10.39	8.65	6.11	4.23	2	1.31	18.06	20.17	72.9	32.2	13.29	9.73	5.11	2.93	7.47	6.36	16.26	10.27	8.28	3.37	8.46	7.78	17.47	10.39	7.82	12.49	15.7	5.05
Isistius brasiliensis	AM I.42172-002		Pacific	189	157	132	111	115	112	40.62	41.52	35.04	18.79	7.16	2.5	14.12	3.47	15.23	17.19	10.64	2.89	9.29	8.89	5.88	4.65	2.11	1.41	17.34	19.13	70.01	34.71	12.2	8.72	5.54	2.88	6.48	6.63	12.81	9.06	6.04	3.69	6.46	7.28	18.28	9.98	7.4	8.82	14	4.57
Isistius brasiliensis	AM I.42030-001		Pacific	188	157	139	108	120	111	40.41	40.59	33.18	17.37	5.57	2.26	13.98	3.54	12.98	15.01	10.84	2.12	8.53	7.7	4.73	4.27	1.65	1.61	17.99	23.04	64.42	34.57	10.61	8.46	5.62	2.72	5.59	5.6	12.41	7.96	6.17	3.11	5.67	7.31	15.42	8.1	7.51	8.52	12.87	3.82
Isistius brasiliensis	AM IA.128		Pacific	393	331	276	235	265	254	78.44	78.41	63.64	31.83	10.15	4.31	23.84	4.51	21.92	25.85	22.18	5.1	21.77	13.95	10.1	8.54	3.8	2.9	35.8	42.18	153.27	69.81	25.3	21.16	11.78	7.02	13.85	10.49	27.03	19.12	13.22	8.9	13.62	13.11	34.76	17.66	13.97	18.83	30.81	14.49
Isistius brasiliensis	AM I.5427		Pacific	345	289	241	204	228	218	69.48	69.15	56.88	30.14	10.69	3.51	21.42	4.78	20.67	29.11	20.41	4.95	17.95	13.22	8.92	8.17	4.19	2.92	28.94	37.92	130.23	57.83	22.45	16.87	10.11	5.5	13.03	9.64	25.44	16.83	12.5	6.27	13.2	11.84	29.98	13.63	14.59	15.65	27.12	10.81
Isistius brasiliensis	AM I.14058		Pacific	370	312	255	213	240	227	76.47	77.8	60.67	31.27	10.34	3.86	22.51	4	24.12	27.11	19.36	4.71	22.52	12.95	9.6	9.4	4.19	2.77	33.32	43.84	134.04	67.48	23.79	17.75	10.73	6.22	11.84	9.87	24.05	16.55	11.69	6.94	12.79	11.4	28.33	16.34	14.05	19.95	32.07	8.24
Isistius brasiliensis	AM I.42066-002(1)		Pacific	244	205	170	144	157	148	52.93	54.98	44.37	24.18	8.52	4.07	18.67	4.8	20.84	24.52	9.77	3.86	13.93	10.04	8.02	5.73	2.49	1.72	20.99	28.73	82.5	50.82	16.27	11.57	6.39	3.58	9.67	6.64	17.63	11.47	7.79	4.61	9.75	8.92	23.26	12.64	8.35	10.81	19.4	8.15
Isistius brasiliensis	AM I.42066-002(2)		Pacific	244	204	165	139	159	149	52.44	53.96	43.68	22.91	8.12	2.71	17.39	3.21	16.99	19.51	15.71	2.81	14.06	10.9	6.85	5.87	2.78	2.26	23.1	30.7	89.3	45.79	14.69	10.12	6.67	4.36	8.04	8.24	17.77	11.04	7.2	4.99	9.26	9.72	21.08	11.81	10.98	11.52	18.11	7.68
Isistius brasiliensis	AM I.42066-002(3)		Pacific	247	210	175	147	152	143	48.75	49.44	40.72	22.38	7.92	3.18	17.04	3.46	16.6	18.51	13.24	3.19	14.82	9.67	8.61	5.52	3.14	2.01	24.04	28.26	86.47	48.08	14.69	10.19	6.13	3.55	6.89	7.23	15.49	11.04	8.53	4.46	7.93	8.56	19.85	11.81	9.53	11.13	18.7	4.54
Isistius brasiliensis	AM I.43100-001(1)		Pacific	330	277	230	195	214	204	66.4	68.44	54.77	29.92	10.71	4.51	22.91	4.28	22.29	23.5	16.89	4.18	18.63	12.73	9.51	6.72	3.42	2.48	30.37	37.89	122.64	57.23	21.53	16.96	8.86	5.12	11.6	9.99	23.3	15.83	11.33	5.96	12.45	13.71	29.39	18.31	8.74	15.42	29.03	12.97
Isistius brasiliensis	AM I.43100-001(2)		Pacific	364	305	257	217	233	224	75.79	77.55	62.69	32.4	11.9	5.5	28.15	6.36	23.28	24.87	19.13	5.3	19.68	14.32	9.81	8.44	3.3	2.51	34.47	39.16	136.43	68.08	26.29	17.05	10.5	6.92	14.14	14.28	26.52	16.15	12.24	7.67	14.12	15.86	33.74	16.86	12.84	19.27	28.62	13.39
Isistius brasiliensis	AM I.4308		Pacific	385	324	273	231	241	228	76.26	79.87	63.61	33.83	12.39	4.72	22.47	6.43	28.22	35.74	17.64	4.96	17.22	15.01	7.45	7.86	4.09	3.21	33.89	40.64	133.16	69.37	22.39	17.33	10.28	5.73	11.81	9.37	22.417	16.22	12.36	7.19	11.09	10.67	32.71	14.3	16.69	15.62	41.24	9.2
Isistius brasiliensis	AM I.7883		Pacific	340	288	239	201	220	210	66.38	67.4	53.51	28.34	10.22	4.09	22.9	5.78	21.77	23.78	17.43	4.15	19.13	12.37	10.26	7.77	3.06	2.65	31.92	38.69	125.82	56.3	23.42	17.48	9.34	6.36	12.29	11.65	22.57	15.06	11.26	6.95	12.13	12.82	29.15	14.32	14.19	19.29	28.66	10.24
Isistius brasiliensis	AM I.43073-001		Pacific	205	173	144	121	123	118	44.83	45.88	37.75	18.56	6.78	1.79	14.28	2.48	14.22	12.02	19.05	2.69	11.12	8.7	5.76	4.13	1.46	1.35	19.66	22.53	72.87	38.43	11.8	8.58	5.61	2.81	6.51	5.67	13.83	8.08	7.05	3.81	6.89	7.52	18.55	11.26	7.68	7.94	19.32	4.82
Isistius brasiliensis	AM I.32445-001		Pacific	160	136	115	98	101	94	33.61	36.39	30.11	17.06	5.87	2.67	13.04	3.31	12.43	12.77	8.54	2.3	9.31	7.39	5.33	3.7	1.37	1.17	12.97	16.9	58.14	30.45	10.25	7.17	3.98	2.59	5.87	4.94	11.77	6.89	5.53	3.18	6.74	5.77	13.23	9.54	5.66	7.9	12.85	5.27
Isistius brasiliensis	AM I.42095-006		Pacific	169	139	114	94	101	94	35.88	38.78	31.99	17.02	6.88	3.21	13.54	2.81	13.51	14.62	7.77	2.31	9.83	7.48	5.1	4.23	1.47	1.04	16.54	17.75	53.32	32.39	11.27	8.22	5.21	2.67	5.95	5.05	11.65	8.88	6.61	2.91	6.02	5.13	16.86	9.95	7.49	8.8	14.99	3.4
Isistius brasiliensis	AM I.9280		Pacific	~424	371	312	258	272	257	87.15	87.43	70.47	35.84	14.03	4.82	28.43	6.22	25.94	29.82	21.74	5.73	24.26	13.58	8.86	8.75	4.02	3.56	49.25	47.68	151.61	82.41	26.74	-	12.33	-	14.7	-	28.55	-	14.52	-	12.73	-	32.96	16.03	14.22	15.7	30.46	12.13
Isistius brasiliensis	AM IB.2523		Pacific	491	407	342	283	305	299	93.28	90.78	74.66	39.45	15	5.87	30.32	7.33	26.99	31.68	24.78	6.63	25.28	15.26	10.84	8.94	5.11	4.8	43.13	47.83	190.06	82.49	33.86	26.39	15.51	8.65	17.88	15.78	34.65	22.5	17.42	10.77	18.11	16.64	41.72	21.19	16.89	23.87	42.43	20.25
Isistius brasiliensis	AM IA.3792		Pacific	360	306	259	210	226	290	79.86	70.44	56.51	29.02	9.62	3.59	19.89	3.5	20.67	24.27	18.12	5.18	17.45	13.49	9.54	6.3	3.93	2.84	37.1	40.23	140.39	63.96	22.13	15.5	8.68	5.94	11.7	9.94	22.94	14.5	10.52	6.19	11.56	12.97	26.5	15.29	12.01	15.56	24.52	10.76
Isistius brasiliensis	AM IA.1427		Pacific	449	383	322	268	-	279	89.95	95.28	73.73	35.1	13.08	6.01	29.26	7.42	25.89	30.95	27.56	6.85	23.88	15.1	11.16	8.92	4.63	4.34	42.41	46.3	194.23	77.16	28.46	21.49	12.97	8.3	15.56	13.14	30.77	21.31	13.4	9.72	17.27	16.41	35.66	19.68	13.6	23.63	38.09	18.91
Isistius brasiliensis	AM I.16150-001		Pacific	506	433	369	304	338	319	91.6	94.55	77.88	39.59	13.68	4.31	26.82	5.83	27.14	33.79	22.68	5.78	25.72	15.08	11.65	9.56	5.46	4.11	51.03	45.86	206.22	77.85	30.68	22.91	13.06	8.26	16.45	14.17	32.5	19.87	14.44	9.06	19.22	19.14	39.17	18.19	18.12	24.05	43.79	19.72
Isistius brasiliensis	CSIRO T718		Pacific	438	374	316	260	287	269	90.42	90.66	73.28	38.1	12.96	5.31	29.8	8.64	28.07	28.24	20.4	5.42	21.89	15.34	10.15	7.76	4.47	3.18	44.43	43.52	169.85	74.94	28.06	20.04	13.9	6.62	14.02	14.26	31.35	18.09	15.08	8.38	15.89	18.37	34.31	19.57	16.9	18.12	46.09	8.18
Isistius brasiliensis	CSIRO T544		Pacific	404	338	287	241	256	236	81.47	83.15	66.89	35.99	13.6	6.09	27.69	6.31	23.36	28.86	20.26	6.85	22	14	9.83	8.14	3.52	2.42	34.13	40.6	145.64	65.24	25.56	20.42	12.34	5.6	13.24	10.77	28.93	20.3	12.23	7.65	15.45	14.03	30.64	16.03	15.18	20.2	20.74	10.33
Isistius brasiliensis	CSIRO CA3302		Pacific	342	287	238	192	-	194	67.41	70.32	58.4	29.52	9.83	3.92	22.2	4.9	20.18	26.04	20.75	4.66	18.25	13.05	8.6	6.5	4.24	2.42	37.66	35.95	117.1	62.9	20.23	16.45	9.09	5.53	10.11	9.3	22.75	15.54	12.05	6.56	10.89	12.95	31.21	15.17	14.87	14.56	33.56	9.49
Isistius brasiliensis	CSIRO CA3137		Pacific	402	335	281	232	247	232	80.12	82.88	66.86	35.86	14.8	5.86	29.13	7.25	24.13	27.75	23.93	5.77	24.13	14.63	10.37	8.69	3.85	3.05	39.01	40.59	135.55	71.13	25.68	20.27	12.64	6.49	13.04	11.52	27.07	15.93	12.62	7.48	13.56	15.13	30.81	17.45	15.62	18.52	37.29	7.81
Isistius brasiliensis	CSIRO H5150-01		Pacific	485	409	347	291	319	299	96.49	96.18	76.42	40.05	14.89	6.07	29.56	7.43	27.16	-	26.08	5.44	26.12	16.11	11.92	9.71	4.71	4.18	39.49	45.14	181.85	77.33	33.26	22.78	14.49	10.35	17.48	16.83	34.47	22.32	16.76	11.9	18.24	21.3	39.89	21.56	18.44	24.66	46.95	18.65
Isistius brasiliensis	CSIRO H4714-01		Pacific	443	379	319	271	291	281	88.29	89.51	72.67	38.98	13.44	5.72	29.43	7.44	27.81	31.75	21.61	5.36	23.01	16.06	11.37	9.22	4.96	4.15	37.41	44.18	178.39	78.48	29.33	23.24	12.22	9.4	15.32	12.12	30.89	21.71	14.3	8.63	16.94	17.25	38.51	18.31	15.49	24.98	36.11	16.74
Isistius brasiliensis	CSIRO CA190		Pacific	455	393	334	279	299	286	92.53	94.19	75.74	40.28	16.04	6.43	30.06	9.93	25.62	35.28	24.14	7.15	23.89	15.28	11.71	9.68	5.97	4.6	44.95	45.59	171.1	82.26	29.69	20.8	13.62	6.88	15.93	14.32	31.76	19.32	15.26	7.85	17.99	15.23	35.49	18.38	17.02	20.55	43.15	8.8
Isistius brasiliensis	CSIRO H6008-01		Pacific	376	318	269	225	238	230	75.74	75.89	60.26	31.9	12.81	5.43	25.19	6.87	21.29	25.9	18.17	4.55	20	12.88	9.21	7.95	3.86	3.19	33.61	36.78	140.02	70.91	25.33	19.66	11.28	5.48	13	8.61	26.12	16.23	13.14	6.6	12.88	13.51	29.73	13.96	15.98	17.31	32.02	9.26
Isistius brasiliensis	CSIRO H3722-01		Pacific	305	251	213	177	207	188	62.79	63.48	53.41	28.31	9.57	4.05	20.45	4.68	19.63	21.92	15.61	4.2	14.8	12.06	8.27	6.8	3.21	2.75	29.33	35.42	106.84	57.49	19.64	13.38	7.55	3.9	10.49	7.93	22.24	14.46	10.04	5.43	11.12	9.66	25.42	13.63	11.5	13.02	25.83	7.11
Isistius brasiliensis	CSIRO ?1		Pacific	465	389	328	270	310	296	87.96	89.33	73.26	37.18	13.94	5.72	31.97	8.8	26.45	28.62	27.9	6.34	23.82	15.91	9.77	10.41	4.83	3.97	48.59	47.43	177.53	75.74	27.3	22.31	11.04	7.42	15.14	12.84	29.9	19.72	14.22	9.06	15.08	15.05	34.07	18.56	18.63	21.32	39.67	16.39
Isistius brasiliensis	CSIRO ?2		Pacific	498	421	355	294	328	313	91.54	92.2	74.89	38.08	12.42	5.34	30.77	7.49	26.98	31.01	24.58	6.28	23.46	16.23	12.03	8.44	4.45	3.5	45.42	51.24	198.45	79.79	29.52	22.03	13.09	9.11	15.05	14.38	32.71	21.47	15.7	9.27	16.92	17.24	35.92	21.64	15.89	20.76	39.9	15.56
Isistius brasiliensis	CSIRO ?3		Pacific	329	279	235	197	214	203	67.53	68.03	55.84	29.47	10.95	4.05	22.09	4.12	19.95	24.36	14.78	5.2	16.99	12.45	7.67	6.92	3.32	3.13	27.89	29.67	128.38	53.52	24.41	18.81	11.28	6.29	13.22	9.76	24.92	16.13	11.01	6.9	13.24	11.5	27.18	15.24	12.54	16.58	27.04	11.66
Isistius brasiliensis	CSIRO CA191		Pacific	375	323	274	229	246	237	75.72	78.01	62.04	32.61	11.54	5.21	24.81	6.71	22.1	26.47	18.01	4.41	19.84	13.28	8.89	7.74	3.88	3.35	33.93	38.11	137.46	67.05	23.61	17.75	10.75	5.68	12.56	9.86	27.3	18.67	12.91	6.4	13.4	13.15	29.51	15.93	12.29	15.1	32.54	8.54
Isistius brasiliensis	MCZ 58094		Atlantic	153	127	105	90	101	97	35.48	35.69	31.01	16.99	6.35	2.64	12.98	3.57	13.53	13.25	6.39	2.42	9.83	7.89	5.91	4.15	1.43	1.07	10.64	16.22	53.64	26.48	11.34	8.22	5.15	3.27	5.38	5.11	12.41	8.74	6.71	3.8	5.99	6.12	12.85	7.94	5.99	7.38	14.48	4.14
Isistius brasiliensis	MCZ 60364		Pacific	156	130	106	90	98	94	33.63	34.95	28.89	15	4.9	1.99	11.7	2.8	12.98	16.07	9.17	-	10.02	7.14	4.99	4.28	1.72	1.17	15.99	18.65	55.67	32.1	9.62	8.72	4.65	2.56	4.35	3.86	9.9	7.67	5.73	2.58	5.1	4.51	14.58	8.16	6.49	6.15	11.1	3.89
Isistius brasiliensis	MCZ 41352		Atlantic	274	235	193	162	178	169	55.23	57.3	46.2	25.46	8.97	4.1	19.21	4.59	20	21.36	12.68	3.86	14.05	11.78	7.8	5.73	2.9	2.46	25.58	32.09	106.82	51.99	17.11	13.17	7.81	4.01	9.74	7.27	18.25	12.13	8.77	4.54	10.28	8.62	21.69	12.34	9.82	8.58	22.46	5.52
Isistius brasiliensis	MCZ 58096(1)		Atlantic	158	129	106	91	99	95	33.91	35.75	29	16.26	5.93	2.51	13.25	3.25	12.28	11.71	7.25	2.2	9.26	7.56	4.69	3.1	-	-	11.51	16.53	50.65	30.81	11.13	9.34	4.56	2.32	5.64	4.31	12.83	8.4	6.36	3.32	6.28	6.08	15.16	8.65	6.71	7.77	14.88	3.09
Isistius brasiliensis	MCZ 58096(2)		Atlantic	224	189	157	130	141	133	44.99	45.36	38.58	21.46	6.01	2.96	15.3	3.48	14.92	18.34	10.16	3.95	12.32	9.74	6.66	4.96	2.2	1.98	21.25	25.13	85.79	40.23	13.78	8.87	5.98	3.9	7.88	8.09	13.84	10.24	6.73	4.37	8.34	6.72	19.73	11.53	7.69	12.53	16.95	5.14
Isistius brasiliensis	MCZ 58095		Atlantic	170	144	118	100	109	104	37.42	37.87	32.04	18.09	6.26	2.76	13.09	3.43	12.71	12.47	8.31	2.35	10.21	8.1	6.3	3.18	2.05	1.6	14.28	20.3	62.38	30.96	12.29	8.78	5.22	2.88	5.7	5.41	11.91	8.08	6.06	3.61	6.77	6.15	15.39	8.76	5.63	10.4	13.9	4.63
Isistius brasiliensis	MCZ 60366		Pacific	178	150	124	102	115	111	37.62	39.09	31.43	16.98	6.08	2.39	12.98	3.23	11.78	12.82	9.3	2.42	9.1	7.68	5.25	3.83	1.79	1.2	14.69	18.75	67.39	31.45	13.23	8.22	5.75	3.06	6.21	5.69	12.93	7.58	6.99	3.64	6.18	6.58	16.89	9.61	6.21	8.63	16.12	2.35
Isistius brasiliensis	MCZ 57370		Atlantic	282	239	198	164	175	165	60.56	60.35	50.12	25.81	8.37	3.92	19.17	5.16	-	-	-	-	16.28	12.22	7.5	6.6	3.18	2.68	27.19	23.31	93.34	55.34	19.73	13.88	7.41	4.95	10.7	9.64	19.56	12.53	9.47	6.37	10.77	10.58	25.69	14.7	10.36	12.37	25.75	6.87
Isistius brasiliensis	MCZ 57371		Atlantic	158	131	106	93	100	97	34.05	35.87	29.02	15.54	5.31	1.64	12.29	2.5	12.79	14.05	6.77	1.94	9.19	7.03	5.2	3.84	1.73	1.13	14.25	20.4	59.35	31.03	9.98	7.24	4.99	2.92	5.79	4.99	11.39	7.33	5.61	2.97	5.6	6.03	15.81	8.65	5.33	7.61	14.22	3.31
Isistius brasiliensis	MCZ 1005		Pacific	475	404	344	286	-	290	84.95	86.18	68.73	34.03	8.63	-	-	-	-	-	-	-	-	-	-	8.08	5.3	4.59	46.27	48.68	183.68	82.33	27.25	19.87	13.26	8.04	13.45	13.01	30.57	18.43	14.83	9.62	14.77	18.14	37.03	20.24	17.68	30.12	38.01	15.56
Isistius brasiliensis	MCZ 55495		Atlantic	386	336	274	227	243	233	79.95	78.56	62.77	34.07	12.9	4.5	-	-	24.68	27.01	19	5.24	21.94	13.44	9.47	8.83	3.8	3.36	40.47	45.14	150.13	77.91	25.27	19.95	11.64	6.29	13.44	9.94	27.8	18.91	14.77	7.66	14.09	12.96	26.34	16.18	12.03	16.37	40.8	7.55
Isistius brasiliensis	MCZ 55499		Atlantic	389	336	284	238	255	238	81.45	82.64	65.41	35.63	12.1	5.25	-	-	29.03	30.24	18.36	6.07	24.1	15.03	13.12	8.7	3.93	3.77	41.32	42.35	130.67	70.97	25.06	16.11	10.58	6.71	13.27	11.71	23.85	15.19	10.48	7.95	12.27	12.53	27.24	18.18	13.78	18.95	43.82	8.68
Isistius brasiliensis	MCZ 55447		Atlantic	392	335	282	236	255	240	83.64	83.25	68.19	35.64	13.6	5.32	-	-	28.34	34.07	17.16	5.46	21.57	14.79	10.43	9.01	4.31	3.43	35.4	39.47	139.23	68.99	26.01	20.29	11.39	7.1	14.16	12.6	27.26	20.1	13.6	8.59	15.69	14.91	34.34	16.38	13.19	23.33	43.36	8.45
Isistius brasiliensis	MCZ 55497		Atlantic	-	-	-	-	-	-	-	-	-	-	-	-	-	-	23.57	27.24	22.35	6.02	-	14.75	11.3	9.59	3.86	3.28	37.11	46.29	137.9	73	23.65	18.87	10.55	6.42	12.57	9.04	25.52	17.01	11.29	6.91	13.85	11.84	31.25	17.87	15.14	19.66	42.44	9.04
Isistius brasiliensis	MCZ 55496		Atlantic	375	328	269	228	243	225	80.49	80.68	63.82	34.84	13.01	4.84	-	-	23.95	26.8	20.12	5.76	20.16	14.29	10.1	8.71	3.47	2.95	36.85	39.21	132.45	72.3	27.25	22.23	13.95	6.27	13.85	9.54	28.34	20.44	13.83	7.18	13.95	12.41	32.02	14.85	12.8	18.9	42.38	8.85
Isistius brasiliensis	MCZ 55498		Atlantic	375	-	265	219	225	213	74.01	73.16	62.28	34.86	11.79	4.43	-	-	25.24	29.93	18.94	5.15	20.31	14.3	11.26	7.66	3.48	2.98	35.42	-	131.33	-	22.81	17.94	10.11	6.19	12.64	9.32	25.63	17.06	12.11	6.62	11.96	10.22	31.43	17.04	13.15	17.03	41.08	7.23
Isistius brasiliensis	MCZ 60365		Pacific	373	320	268	220	237	219	71.85	73.57	62.39	32.34	11.77	4.5	-	-	24.31	29.64	18.85	5.21	22.13	14.51	10.08	7.81	3.77	2.64	38.66	40.6	146.23	60.39	24.71	19.83	11.89	6.31	15.05	9.71	28.38	19.26	12.21	7.48	16.12	11.54	32.78	18.77	13.07	21.92	32.54	13.45
Isistius brasiliensis	MCZ 41353		Atlantic	349	296	247	203	223	205	81	82.74	66.56	34.02	13.25	4.62	-	-	-	-	-	4.57	20.89	14.25	10.03	8.19	3.52	3.03	33.63	39.97	106.56	68.99	24.92	16.14	11.55	6.51	13.7	12.49	27.23	18.25	14.89	7.86	14.75	14.96	29.19	14.72	14.06	20.43	38.61	8.06
Isistius brasiliensis	MCZ 41351		Atlantic	331	278	232	189	211	198	66.52	67.07	53.51	28.77	9.33	3.52	-	-	-	-	16.66	-	18.05	12.34	9.08	6.33	2.48	1.81	33.96	38.01	126.02	62.29	20.56	14.46	8.88	5.46	11.63	8	22.09	13.68	10.06	6.55	11.99	9.8	26.3	14.78	12.27	14.74	31.28	6.58
Isistius brasiliensis	MCZ 41350		Atlantic	271	234	195	164	172	163	57.31	57.2	46.18	25.35	8.48	3.1	-	-	18.48	-	15.77	3.67	14.64	11.49	7.9	6.28	2.42	1.91	23.2	28.59	100.86	49.97	18.72	14.44	8.62	4.63	9.5	6.73	19.67	12.34	8.85	4.98	10.7	9.38	22.37	12.63	9.18	12.34	24.23	5.76
Isistius brasiliensis	MCZ 60367(1)		Pacific	478	415	348	297	325	310	90.7	90.53	74.39	37.31	14.48	4.72	-	-	27.83	32.23	24.83	5.47	22.58	15.45	10.07	10.15	4.42	3.32	39.11	48.46	181.83	85.57	27.26	19.2	12.47	7.05	15	7.97	27.9	21.06	14.93	8.44	15.37	14.05	35.96	17.23	16.51	22.14	38.15	14.57
Isistius brasiliensis	MCZ 60367(2)		Pacific	462	403	344	283	319	296	93.12	91.12	72.05	38.62	13.94	4.26	-	-	27.59	31.33	20.53	6.07	22.64	15.84	11.14	9.48	3.95	3.3	40.65	45.37	171.06	76.26	27.6	20.23	12.74	9.91	15.5	12.65	29.14	19.29	13.79	9.77	15.85	15.91	35.58	18.21	15.61	24.26	35.21	17.24
Isistius brasiliensis	MCZ 36039		Atlantic	382	327	275	221	241	230	73.99	72.53	60.13	30.59	9.72	-	-	-	27.16	-	13.21	-	19.73	-	-	6.73	3.75	2.88	36.85	40.91	152.25	64.87	26.52	21.45	12.38	8.27	13.48	8.55	25.22	14.81	12.1	7.68	11.8	12.68	31.49	13.53	12.53	17.58	38.28	9.35
Isistius brasiliensis	MCZ 13685		Pacific	463	394	333	277	307	293	94.1	93.76	74.95	36.26	11.79	-	-	-	25.69	32.47	23	-	21.74	16.95	12.83	10.66	3.77	2.83	46.23	48.05	183.44	73.66	26.91	18.62	10	8.88	15.64	12.96	30.08	18.12	13.89	9.82	15.3	18.17	35.11	15.32	16.86	23.05	40.39	16.4
Isistius brasiliensis	YPMICH 3727		Atlantic	428	365	309	259	284	268	84.17	83.66	68.86	37.17	14.28	5.88	-	-	25.04	31.13	20.58	5.76	23.85	13.55	11.41	8.49	3.99	3.06	38.36	41.26	168.15	72	27.21	19.1	10.67	7.15	14.59	13.61	29.95	17.89	12.94	9.09	16.73	17.14	34.55	19.23	16.47	20.98	35.9	14.85
Isistius brasiliensis	USNM 221045		Pacific	448	375	317	270	285	274	86.83	87.29	68.07	34.07	13.21	4.58	24.44	4.27	-	-	-	6.71	21.37	13.07	9.69	8.74	-	-	41.1	48.99	179.69	78.3	25.11	18.67	11.53	9.1	14.17	11.82	27.89	19.53	12.12	8.79	13.53	13.09	25.05	19.23	15.36	16.79	34.09	16.95
Isistius brasiliensis	USNM 221044(1)		No data	389	330	273	224	253	243	81.02	80.43	65.8	33.46	13.06	4.45	23.6	4.92	-	-	-	7.6	22.36	13.64	9.57	8.74	4.91	3.23	39.8	42.77	139.25	69.81	22.86	17.56	10.19	6.43	12.16	9.41	25.85	15.43	13.78	7.26	12.67	11.18	31.32	16.25	14.3	18.61	39.74	7.51
Isistius brasiliensis	USNM 221044(2)		No data	380	325	271	228	245	235	75.68	77.39	63.58	33.37	11.85	5.71	23.33	6.62	-	-	-	7.42	21.05	13.15	10	7.4	4.68	3.43	37.36	41.29	136.86	67.6	23.78	18.44	10.5	6.84	12.36	11.61	25.58	16.28	11.99	8.41	13.7	13.83	31.43	17.56	13.89	17.69	31.58	12.92
Isistius brasiliensis	ANSP 111459		Atlantic	322	269	225	188	-	189	67.08	66.83	54.29	28.97	9.75	3.44	22.75	5.23	17.74	22.29	16.48	5.13	15.56	12.41	8.42	5.33	2.34	2.22	30.49	33.22	124.83	56.83	20.18	14.58	7.65	-	11.44	-	21.32	15.13	9.87	5.94	11.07	10.36	25.68	14.68	11.1	12.73	26.56	10.1
Isistius brasiliensis	USNM 215947		Pacific	364	305	255	215	225	216	76.3	77.3	63.03	32.02	12.46	4.64	25.45	6.13	21.99	25.67	18.24	4.03	20.71	12.6	10.12	7.23	-	3.43	32.32	37.78	135.86	65.22	24.43	19.52	10.48	6.35	13.46	9.01	26.36	17.75	12.81	8.25	13.37	11.7	31.13	16.23	12.62	21.73	35.75	9.5
Isistius brasiliensis	USNM 190035		Pacific	365	307	258	214	224	209	79.99	80.8	64.99	31.72	11.39	3.58	24.86	5.38	21.67	-	18.36	6.45	20.55	14.65	9.67	8.35	-	-	33.48	42.55	115.35	66.39	23.41	18.11	9.58	6.55	12.75	9.6	26.23	17.71	13.18	9.29	12.79	13	31.91	14.54	14.02	20.97	39.82	8.77
Isistius brasiliensis	USNM 221043		No data	463	390	324	274	295	282	88.15	90.38	71.69	37.44	13.35	5.29	28.43	6.14	-	-	-	6.51	26.19	15.94	12.76	10.49	3.84	3.35	40.06	53.29	171.67	79.15	27.96	22.86	12.35	8.46	14.98	10.95	28.33	19.68	13.34	9.07	15.07	12.18	41.53	22.68	14.83	23.15	39.98	18.24
Isistius brasiliensis	USNM 190034		No data	374	315	266	226	215	200	72.58	72.44	60.87	31.85	11.25	4.33	22.55	5.25	20.42	-	18.57	5.77	18.56	12.53	9.1	8.12	3.83	3.14	28.98	40.17	141.17	70.6	21.73	18.9	9.85	6.9	12.25	8.8	23.01	17.01	11.15	7.46	11.69	10.15	28.51	16.6	13.31	14.31	31.68	14.8
Isistius brasiliensis	USNM 190038		Pacific	250	214	176	145	164	158	58.29	57.4	46.26	22.16	7.61	2.2	18.35	3.72	19.31	23.49	15.78	3	13.22	10.6	7.74	7.4	2.87	2.37	21.89	27.16	90.01	43.97	16.92	11.98	6.76	4.7	9.32	6.46	16.87	12.53	8.55	4.88	9.1	7.62	22.46	11.34	9.01	13.61	23.34	5.35
Isistius brasiliensis	USNM 190037		Pacific	190.27	157.78	131.65	112.23	119.93	115.11	46.16	47.77	39.61	21.24	6.9	2.15	16.25	3.51	14.41	15.65	14.36	3.12	11.53	9.82	6.86	5.17	2.1	1.76	17.39	24.9	73.14	36.97	12.64	8.77	5.54	3.32	7.22	5.8	12.59	8.4	6.46	3.36	5.52	5.72	20.03	11.13	8.16	10.32	16.26	6.52
Isistius brasiliensis	USNM 190039		Pacific	344	289	243	203	209	201	71.02	72	58.1	30.35	11.2	4.76	23.14	4.82	22.17	24.31	17.99	4.57	17.46	12.3	8.36	7.24	3.72	2.97	32.69	33.76	127.57	62.93	21.3	19.09	10.34	6.44	11.19	8.15	24.22	16.21	11.49	7.02	13.6	11.18	29.86	16.12	11.85	17.93	29.43	7.85
Isistius brasiliensis	USNM 190033		Pacific	228	193	159	134	143	133	50.11	51.32	42.07	22.91	8.18	2.68	16.11	4.12	16.36	18.04	14.7	3.26	13.93	9.87	7.09	5.34	2.51	1.64	19.72	25.2	82.96	40.61	12.48	9.54	10.34	3.48	6.66	5.3	14.95	9.09	7.92	4.05	7.75	7.35	20.08	11.17	8.99	10.86	18.24	5.5
Isistius brasiliensis	USNM 164173		No data	166.98	137.33	114.8	96.22	104.69	99.07	37.46	38.26	31.19	16.74	5.44	2.03	12.65	2.03	12.5	12.18	9.31	2.38	9.76	7.19	5.47	3.92	1.82	1.12	16	17.97	62.43	32.8	11.72	8	5.31	2.8	6.45	3.87	12.97	8.74	5.77	2.7	7.41	5.61	16.69	10.44	7.01	9.88	15.5	3.58
Isistius brasiliensis	USNM 190043		Pacific	179.84	158.34	130.86	110.5	112.17	109.44	42.12	42.74	34.46	18.43	6.19	2.19	15.64	2.91	13.94	13.48	9.52	2.41	8.79	8.14	5.55	3.49	1.39	1.29	18.26	23.79	71.37	36.37	12.19	8.31	5.8	3.04	7.7	5.31	13.68	8.22	5.46	3.57	7.55	6.28	17.47	10.57	6.2	10.98	15.8	5.16
Isistius brasiliensis	USNM 190041		Pacific	226	191	161	136	150	141	48.83	49.45	40.21	22.03	7.88	3.33	17.01	3.22	16.29	17.28	14.31	2.85	12.18	9.15	6.82	5.21	1.95	1.61	21.24	23.28	84.14	42.46	15.32	11.81	7.09	4.41	6.74	5.74	16.54	11.12	8.11	5.14	8.6	7.28	21.6	1.68	8.7	14.9	22	6.2
Isistius brasiliensis	USNM 190036		Pacific	163.71	140.99	112.18	95.35	103.6	101.61	38.29	38.87	32.95	18.17	6.45	2.03	13.6	2.65	11.26	13.49	11.19	2.52	9.4	8.01	5.4	4.05	1.36	1.22	15.61	18.74	58.74	30.47	11.31	8.63	6.33	3.02	5.55	5.27	13.56	9.23	6.98	3.73	5.71	6.09	16.45	9.14	5.85	9.5	14.59	3.91
Isistius brasiliensis	USNM 190042		Pacific	178	141	114	104	103	97	36.76	37.55	29.51	16.69	5.35	2.57	13.39	2.99	13.14	13.8	8.98	1.93	8.55	7.65	5.53	4.53	1.56	1.2	18.39	20.28	57	32.53	10.71	8.31	4.83	3.09	6.36	5.36	10.69	7.48	5.72	3.14	6.43	5.57	14.9	8.25	5.38	6.77	15.41	3.05
Isistius brasiliensis	USNM 190040		Pacific	170	131	118	92	100	98	35.41	35.91	30.22	16.62	5.85	2.58	12.81	2.93	12.7	12.65	8.57	2.49	8.21	7.66	5.38	3.86	1.4	1.15	12.59	16.22	55.47	27.52	11.23	8.6	5.5	3.09	6.31	5.55	12.69	8	5.82	3.49	6.7	5.71	15.15	9.65	5.02	7.66	13.11	4.14
Isistius brasiliensis	USNM 164174		Pacific	187	164	136	112	120	114	39.24	40.81	33.29	17.99	6.53	2.53	13.81	2.85	13.16	14.46	10.36	2.42	9.53	8.4	5.68	4.98	2.04	1.44	16.39	21.77	68.98	32.7	11.58	8.4	5.7	2.55	6.46	4.6	13.42	8.1	7.55	2.93	7.24	6.44	16.48	9.87	6.52	7.08	13.75	4.27
Isistius brasiliensis	USNM 418838		Pacific	250	212	177	158	165	156	53.49	54.06	44.44	23.51	8.35	3.13	17.2	2.04	17.28	19.53	16.48	4.07	13.34	10.13	8.27	5.8	2.93	2.31	22.92	24.57	92.71	43.39	15.59	11.87	7.52	4.54	8.1	6.79	16.34	9.68	8	4.48	9.02	7.51	22.91	12.47	9.91	11.92	18.39	7.55
Isistius brasiliensis	USNM 418822		Pacific	192	162	133	119	122	118	43.63	43.03	32.67	18.1	6.26	2.64	12.93	2.65	13.97	15.56	8.95	2.37	8.73	9.63	6.07	4.94	2.38	1.61	17.85	22.89	68.69	34.75	12.26	8.99	5.06	3.13	6.86	6.51	12.5	7.29	5.71	3.39	7.02	5.02	17.78	9.07	6.06	7.13	14.32	5.68
Isistius brasiliensis	USNM 418823		Pacific	195	167	140	129	123	118	43.15	43.31	34.76	18.94	6.35	2.92	12.81	2.84	14.57	16.66	12.26	3.21	10.4	9.1	6.46	5.69	2.62	2.03	17.04	20.3	67.49	36.56	11.83	8.55	5.31	2.86	6.39	5.1	12.46	7.49	6.28	3.42	6.86	5.68	17.12	10.05	6.87	9.2	15.77	3.46
Isistius brasiliensis	UF 165691		Atlantic	173	144	121	99	110	102	39.15	39.36	32.86	18.11	6.06	2.96	13.76	2.97	12.63	13.06	9.41	2.39	9.25	8.16	4.96	4.07	1.62	1.28	15.77	19.04	64.7	31.56	13.36	9.5	5.34	3.6	6	4.44	13.96	8.96	6.63	3.97	7.79	6.41	15.42	10.69	7.31	9.49	14.33	4.95
Isistius brasiliensis	UF 224657		Atlantic	-	-	-	-	-	-	35.82	37.47	30.55	15.08	4.88	2.04	-	-	-	-	-	2.19	7.64	6.52	4.28	3.81	-	-	16.72	21.03	-	-	-	-	-	-	-	-	-	-	-	-	-	-	-	-	-	-	-	-
Isistius brasiliensis	UF 207807		Atlantic	-	-	-	-	-	-	55.92	-	46.67	24.08	7.88	-	-	-	-	-	-	3.83	13.33	-	-	6.23	-	-	25.56	31.58	-	-	-	-	-	-	-	-	-	-	-	-	-	-	-	-	-	-	-	-
Isistius brasiliensis	UF 224595		Atlantic	-	-	-	-	-	-	72.09	75.51	59.51	29.4	9.15	-	22.16	-	-	-	-	-	-	14.94	11.99	8.89	-	-	36.68	39.67	-	58.4	-	-	-	-	-	-	-	-	-	-	-	-	-	-	-	-	-	-
Isistius brasiliensis	UF 232954		No data	-	-	-	-	-	-	76.47	77.29	60.53	29.38	6.81	2.16	18.46	3.32	-	-	-	4.35	12.55	16.22	10.23	7.5	3.73	2.79	-	27.1	-	55.02	-	-	-	-	-	-	25.23	22.79	17.38	11.6	9.13	-	20.69	13.66	9.89	-	28.13	8.03
Isistius brasiliensis	UF 79884		Pacific	-	-	-	-	-	-	-	-	-	32.61	10.75	4.64	27.57	5.7	30.96	31.66	13.46	5.55	16.79	14.11	9.48	8.41	3.56	3.18	33.5	41.52	-	68.14	22.6	-	11.37	-	11.85	-	-	-	-	-	-	-	30.699	15.8	15.18	16.46	-	-
Isistius brasiliensis	UF 232917		Atlantic	406	355	297	242	282	267	88.81	87.75	69.49	35.35	13.83	5.34	27.59	7.42	22.54	30.26	27.35	5.75	21.42	14.48	8.72	10.05	3.6	3.83	42.64	47.57	141.4	79.87	23.72	19.07	10.4	8.22	12.57	10.78	26.25	17.19	12.6	9.16	13.71	13.36	28.38	15.35	14.7	22.08	41.05	9.37
Isistius brasiliensis	UF 35686(1)		Atlantic	358	304	252	211	231	220	71.93	71.62	57.67	30	10.58	4.35	21.82	5.28	22.54	-	19.04	4.48	17.12	13.53	9.35	7.45	3.09	2.63	32.56	39.92	134.17	69.36	24.28	16.57	10.9	6.47	12.56	11.11	25.13	17.74	12.9	7.84	12.36	10.75	28.41	15.89	11.89	14.74	32.19	7.19
Isistius brasiliensis	UF 35686(2)		Atlantic	395	333	284	235	253	234	79.93	79.96	64.68	33.03	12.23	4.6	26.36	5.44	24.42	-	22.26	4.75	20.12	14.41	9.38	8.8	3.66	3.31	39.16	43	137.69	73.64	25.39	19.88	11.85	6.84	13.76	9.84	26.37	17.45	12.24	7.72	14.34	12.6	31.71	13.39	15.65	18.57	36.66	8.54
Isistius brasiliensis	UF		No data	266	233	193	164	166	156	54.33	53.35	44.7	22.48	8.33	2.9	16.24	3.8	14.84	18.81	16.86	3.38	12.76	10.12	8.15	6.29	2.74	2.52	24.988	31.3	97.84	53.29	16.78	12.49	6.59	4.23	8.27	6.74	18.62	11.42	8.66	4.79	9.76	9.42	21.43	12.91	9.3	14.82	22.39	5.53
Isistius brasiliensis	ex-BPBM24490		Pacific	485	408	349	302	286	264	82.24	84.41	67.45	35.27	11.87	4.31	25.53	3.9	25.93	31.79	22.3	6.29	21.55	14.78	10.37	9.97	5.34	5.04	38.3	46.38	-	76.27	27.46	21.48	11.55	8.42	16.54	12.37	31.05	21.39	14.75	9.42	17.38	16.01	32.36	19	17.1	24.66	40.3	16.79
Isistius brasiliensis	ex-BPBM24471		Pacific	295	248	204	169	184	172	62.11	64.12	50.48	26.69	9.43	3.4	19.38	4.19	19.6	21.17	14.51	4.19	15.51	12.1	8.63	7.62	3.47	2.84	25.01	32.66	104.68	57.82	20.09	15.69	9.61	4.12	11.57	8.04	20.95	14.03	10.92	6.9	12.33	10.17	24.95	14.63	11.36	11.28	25.41	6.96
Isistius brasiliensis	SIO 80-176		Pacific	382	328	276	229	238	227	85.79	85.83	70	37.28	14.16	5.88	26.71	7.52	25.49	29.32	19.98	5.67	19.64	14.49	10.4	7.97	3.68	2.68	38.13	39.32	129.1	68.99	26.08	20.61	11.45	6.84	15.11	11.04	28.76	20.9	14.22	8.42	15.57	13.74	34.37	17.42	14.17	21.6	40.91	10.32
Isistius brasiliensis	SIO 78-183		Pacific	393	337	281	234	245	224	79.28	77.89	66.66	36.27	14.9	5.7	28.68	6.36	23.59	26.34	20.58	5.26	24.05	13.94	9.89	8.94	4.06	3.03	37.63	41.76	145.01	70.3	23.27	21.04	10.79	7.44	12.83	10.36	26.99	19.2	12.71	9.33	14.45	13.89	30.07	17.75	12.62	20.71	43.77	10.17
Isistius brasiliensis	SIO 73-413(1)		Pacific	403	348	291	243	255	235	77.74	80.9	65.33	35.01	13.75	5.97	24.93	6.32	24.4	30.7	15.99	5.43	18.63	13.64	9.89	8.94	4.06	3.03	37.63	41.76	145.01	70.3	23.27	21.04	10.79	7.99	12.96	11.48	26.94	18.13	13.11	9.51	14.2	14.64	31.57	16.91	12.92	19.75	42.19	9.95
Isistius brasiliensis	SIO 73-413(2)		Pacific	423	363	290	249	256	243	86.84	86.05	68.95	35.77	14.19	4.92	-	5.2	-	-	-	5.39	18.61	14.12	10.17	9.11	3.94	3.34	38.56	46.99	149.54	75.79	30.02	18.7	11.74	7.92	14.4	12.7	28.58	19.04	13.11	9.13	15.96	15.31	33.17	16.76	13.41	21.01	43.65	7.75
Isistius brasiliensis	SIO 02-136		Pacific	397	332	277	228	261	243	80.66	81.88	66.4	33.63	11.41	5.24	25.84	6.78	21.49	27.46	23.52	4.47	16.69	13.61	10.03	7.6	3.53	3.02	38.37	44.04	148.78	73.11	25.13	20.19	11.19	5.95	13.96	9.94	28.52	21.78	14.58	8.61	14.35	13.11	34.56	16.56	13.36	21.25	43.26	11.09
Isistius brasiliensis	SIO 73-157		Pacific	412	347	295	245	247	232	86.22	84.84	70.57	36.76	14.92	5.86	28.65	6.64	27.02	28.68	22.25	5.88	21.18	15.64	10.86	10.27	4.63	3.55	35.46	41.66	152.01	69.64	26.69	21.14	12.21	7.75	13.89	11.2	28.22	19.89	13.03	7.88	15.34	13.14	33.66	16.87	13.32	21.45	42.49	9.23
Isistius brasiliensis	SIO 52-413		Pacific	396	333	279	239	242	223	86.78	88.06	71.43	37.09	13.5	5.29	29.6	6.77	28.15	31.33	18.69	6.22	22.7	15.42	10.65	9.23	4.42	3.16	35.89	44.3	129.45	74.83	25.37	18.9	10.41	6.48	14.15	11.18	-	18.49	12.9	7.63	-	-	32.43	18.18	13.5	19.8	40.67	8.39
Isistius brasiliensis	SIO 73-162		Pacific	332	277	228	195	205	194	70.2	69.2	56.12	29.4	9.67	4.05	21.75	3.5	22.04	25.24	16.65	3.83	16.66	12.85	9.3	6.55	2.96	3.11	26.94	36.45	130.07	57.78	20.27	17.24	9.37	5.37	11.05	7.65	23.41	17.28	11.14	8.11	12.78	12.04	29.93	16.69	10.47	15.79	26.12	10.45
Isistius brasiliensis	SIO 69-345		Pacific	467	397	337	277	318	298	95.91	94.81	76.15	40.71	13.48	5.88	32.52	7.26	31.61	36.82	19.02	6.31	23.77	17.47	12.48	9.74	4.15	3.32	49.35	52.77	194.12	82	28.77	21.61	11.43	9.13	16.28	13.85	31.83	21.44	14.14	9.5	16.82	14.52	38.52	20.2	16.48	23.81	43.93	16.89
Isistius brasiliensis	TCWC 8770-09		Atlantic	446	377	320	270	284	264	83.48	85.15	69.85	36.35	12.91	4.72	25.73	4.76	23.37	29.47	23.85	6.67	20.33	15.08	12.22	8.83	4.73	3.83	40.98	47.07	174.36	78.77	29.81	23.24	11.45	6.8	16.81	10.41	31.3	19.09	13.52	8.91	16.16	15.69	34.49	21.34	13.78	14.66	37.8	15.12
Isistius brasiliensis	TCWC 3985.01		Atlantic	397	342	293	242	246	229	86.01	85.46	70.61	37.53	14.41	5.34	27.77	5.36	25.41	28.14	28.9	5.75	20.6	14.43	11.22	9.08	3.49	3.09	38.66	39.63	151.15	68.62	24.85	19.63	10.33	6.13	13.75	9.67	27.17	19.67	12.38	8.41	15.02	12.53	32.17	17.24	16.54	22.02	45.47	11.08
Isistius brasiliensis	TCWC 5130.01		Atlantic	257	216	189	146	-	159	51.74	53.19	44.8	25.15	8.87	3.54	17.97	3.71	19.13	22	12.92	3.4	11.17	11	8.35	5.99	2.84	2.17	27.33	26.99	98.17	46.7	17.86	14.29	6.98	4.44	8.97	7.56	18.47	12.39	8.31	5.84	10.61	9.55	23.24	13	8.84	15.7	20.32	8.93
Isistius brasiliensis	TCWC 5131.01		Atlantic	178	149	122	103	109	104	38.95	39.37	33.75	18.28	6.4	2.83	14.52	3.35	14.22	14.38	8.09	2.56	9.63	8.59	6.05	3.49	2.44	2.06	17.32	20.26	64.94	30.67	11.34	7.9	5.02	3.57	6.44	5.29	12.73	8.4	5.59	3.9	6.98	6.29	14.73	8.73	5.62	9.81	14.41	4.34
Isistius brasiliensis	LACM 46044-1		Pacific	215	183	154	127	139	135	45.55	47.78	37.97	21.6	6.76	2.86	15.93	2.74	16.15	16.76	10.4	2.26	11.05	9.7	5.78	5.08	2.48	1.58	19.75	20.42	82.88	40.78	10.85	8.3	4.75	4.21	6.52	5.3	14.49	8.96	6.35	4.69	6.93	6.23	16.83	11.99	6.28	10.06	16.01	4.2
Isistius brasiliensis	LACM 46047-1		Pacific	191	162	134	114	115	107	42.31	43.53	35.53	19.03	5.81	1.98	13.6	2.25	14.93	16.2	8.79	2.37	10.7	8.29	5.97	4.48	2.71	1.93	14.96	19.25	63.62	33.55	11.37	8.91	5.35	3.48	6.81	5.13	12.11	8.7	5.85	3.83	6.57	6.41	15.6	9.87	7.39	6.89	13.35	2.88
Isistius brasiliensis	LACM 55936-1		Pacific	220	186	155	131	142	133	47.98	47.5	39.79	20.93	7.01	2.63	14.77	2.43	15.07	17.54	12.79	3.15	11.76	9.54	7.68	6.38	2.36	2.15	17.05	22.96	85.03	39.15	13.76	10.45	6.18	4.34	8.4	6.71	15.67	10.01	6.94	4.69	7.76	8.02	19.8	10.55	7.12	12.63	16.37	5.04
Isistius brasiliensis	LACM 46048-1		Pacific	161	134	111	95	102	98	34.1	35.81	29.73	16.36	5.71	2.33	12.85	2.01	11.73	12.56	10.33	2.39	8.29	6.68	5.19	4.52	1.85	1.28	12.9	17.84	57.77	29.38	10.85	7.65	4.98	2.86	6.15	4.57	11.28	7.01	5.44	3.21	5.86	5.3	15.6	8.97	5.55	7.67	12.99	3.44
Isistius brasiliensis	LACM 46046-1		Pacific	325	274	234	194	199	191	72.6	71.33	57.28	29.37	11.14	3.98	20.76	4.57	20.9	25.21	18.01	4.57	14.95	12.92	9.28	8.42	3.75	2.79	31	32.33	116.31	59.26	22.09	17.42	9.65	6.45	12.55	9.76	24.53	16.37	11.24	8.42	13.34	12.38	30.43	15.21	10.98	19.04	33.24	7.45
Isistius brasiliensis	UW 021895		Pacific	466	402	345	285	288	279	95.38	91.14	76.5	40.43	14.15	6.09	30.38	5.4	27.37	33.12	27.34	6.63	23.16	16.51	11.91	8.73	4.34	3.67	42.73	45.58	177.05	76.95	29.31	23.47	13.72	8.45	15.9	12.95	28.96	19.31	14.58	10.26	15.27	15.61	37.18	19.9	15.97	27.03	41.81	15.01
Isistius brasiliensis	UW021809		Pacific	403	346	294	246	260	245	88.33	86.93	70.76	33.94	11.87	4.8	24.48	5.94	27.52	36.12	22.16	5.48	19.61	15.71	11.34	9.98	4.57	2.99	36.93	39.94	146.76	71.55	26.56	19.39	11.2	7.19	14.81	11.29	29.35	17.57	13.07	7.76	16.25	15.42	34.22	18.9	14.26	22.06	41.28	7.92
Isistius brasiliensis	UW 021822		Pacific	394	337	281	236	251	237	81	81.15	66.08	34.36	11.98	5.23	26.71	6.38	24.95	27.77	20.48	5.42	19.9	14.8	10.81	8.28	4.15	3.83	33.38	42.25	147.91	67.67	25.7	18.11	10.47	7.78	13.44	11.55	25.69	16.38	12.37	8.84	12.35	14.58	32.75	16.5	13.87	20.36	32.48	13.19
Isistius brasiliensis	UW 047600		Pacific	490	419	353	297	317	304	93.1	94.26	77.03	37.35	12.98	5.15	30.29	5.59	25.98	33.66	25.82	6.71	19.17	-	-	8.3	4.84	3.81	48.29	54.25	193	83.14	29.9	20.84	11.81	8.78	16.88	12.57	31.51	21.23	13.4	9.09	18.28	15.92	36.08	19.93	17.14	19.78	47.98	13.68
Isistius brasiliensis	CAS 222996		Atlantic	377	315	275	229	-	230	79.85	80.98	64.27	33.54	10.01	-	25.67	-	27.2	27.95	19.25	4.28	19.81	15.66	10.99	8.55	4.42	3.29	38.19	39.11	142.08	71.04	21.88	-	8.73	-	12.89	-	25.34	16.23	10.63	6.75	14.34	-	31.33	17.72	12.06	16.84	39.79	8.5
Isistius brasiliensis	BPBM 24506		Pacific	350	295	246	202	222	209	73.56	72.78	60.05	32.72	11.73	4.61	24.68	5.72	23.94	24.81	17.01	4.86	18.65	12.61	8.81	6.84	3.1	2.54	35.31	41.92	136.66	71.31	21.15	15.99	8.3	7.02	12.94	9	26.72	18.59	12.1	6.68	14.81	11.02	32.55	17.32	12.6	17.5	35.16	7.39
Isistius brasiliensis	BPBM 24490(1)		Pacific	220	186	157	129	141	135	49.65	47.66	39.53	21.45	7.92	3.41	14.9	3.71	15.42	17.09	10.48	3.23	10.87	9.39	6.25	5.08	2.29	2.15	21.6	22.35	77.8	40.2	14.61	10.97	7.05	4.15	7.19	6.72	15.23	8.2	7.38	4.85	7.01	8.32	16.7	12.18	7.83	9.55	18.37	3.21
Isistius brasiliensis	BPBM 24490(2)		Pacific	260	219	183	151	167	159	54.18	54.49	44.27	23.78	7.65	3.4	18.11	2.71	16.45	19.74	16.01	3.64	12.37	11.03	7.18	5.99	2.41	1.99	25.25	28.97	90.65	47.73	15.4	11.87	7.43	4.46	8.44	7.09	18.58	11.55	8.71	5.81	10.08	9.7	21.51	11.95	7.99	13.17	22.52	5.55
Isistius brasiliensis	BPBM 24471		Pacific	363	312	254	208	228	216	70.58	71.81	58.98	32.04	10.43	3.77	23.9	5.06	25.27	27.92	16.27	4.49	17.12	12.9	9.43	7.92	3.18	2.92	36	43.79	129.09	74.32	22.3	16.5	10.39	6.83	12.8	9.52	23.88	14.02	11.08	7.04	13.44	13.04	30.36	13.82	11.79	15.62	31.8	12.09
Isistius brasiliensis	BPBM 24500		Pacific	266	228	193	160	166	156	55.98	55.29	46.62	24.12	8.6	2.9	19.57	4.2	19.26	23.7	12.34	3.86	13.17	9.8	8.2	6.46	3	2.48	25.38	31.89	102.24	49.75	16.43	11.08	7.53	4.93	9.09	8.65	-	10.36	8.25	4.86	-	-	19.37	12.46	8.95	12.61	21.99	8.11
Isistius brasiliensis	BPBM 24544		Pacific	227	198	160	131	150	141	45.2	46.01	40.04	20.44	6.95	3.18	15.66	3.24	15.5	14.83	10.86	3.29	10.41	-	-	4.04	2.24	-	22.07	26.13	84.31	42.86	-	9.64	5.76	3.4	-	-	17.4	10.47	8	4.02	8.4	7.15	20.58	10.89	8.6	9.9	18.13	5.32
Isistius brasiliensis	BPBM 3504		Pacific	400	335	287	236	249	227	80.93	81.16	67.28	-	-	-	-	-	-	-	-	-	19.26	-	-	7.94	4.1	3.04	38	41.31	139.63	72.97	-	-	10.36	7.15	-	-	25.21	15.29	12	7.98	13.57	13.66	29.11	15.72	13.9	16.48	36.34	8.51
Isistius brasiliensis	BPBM 24502(1)		Pacific	364	310	260	218	237	229	70.44	71.82	58.26	31.36	10.69	4.3	20.23	-	20.96	28.72	17.71	5.59	16.98	-	-	7.73	4.75	3.09	32.46	36.41	137.07	62.62	-	-	9.82	-	-	-	25.29	15.57	11.41	8.02	12.11	12.29	32.81	15.2	12	14.67	28.97	-
Isistius brasiliensis	BPBM 24502(2)		Pacific	402	339	289	242	249	238	77.8	76.52	65	31.5	11.64	-	22.71	-	21.79	30.45	22.98	4.94	20.04	-	-	7.74	4.75	2.91	40.27	40.38	145.66	65.83	25.5	18.96	10.65	6.56	13.62	10.76	28.46	21.07	13.26	-	13.98	-	32.63	19.85	13.41	16.15	33.58	-
Isistius brasiliensis	BPBM 24502(3)		Pacific	477	409	343	282	286	270	90.39	91.34	74.14	36.74	12.89	5.32	27.22	5.93	24.57	33.41	20.82	5.72	21.72	-	-	8.19	5.27	5.11	47.49	47.56	176.63	78.11	27.55	23.43	12.19	-	13.65	-	30.9	21.59	14.98	9.4	15.74	15.28	36.77	19.23	15.98	21.73	44.46	14.53
Isistius brasiliensis	BPBM 24538(1)		Pacific	165	138	114	94	105	100	36.84	37.86	31.19	16.14	4.83	2.06	10.16	2.1	11.23	13.47	10.7	2.09	8	-	-	3.75	-	-	15.52	19.4	56.41	30.25	10.79	8.88	4.2	-	5.66	3.84	11.11	7.12	5.2	2.85	5.05	3.83	17.14	10.65	5.69	7.64	13.71	-
Isistius brasiliensis	BPBM 24538(2)		Pacific	230	195	158	135	140	129	49.16	49.51	41.21	22	7.83	2.94	15.84	3.65	16.28	21.83	11.88	3.02	12.92	9.87	7.3	4.49	2.78	1.77	19.02	27.17	80.25	43.79	15.04	10.74	7.25	4.3	8.58	7.5	17.07	9.48	7.8	4.52	8.83	8.96	21.45	11.99	8.4	11.98	20.39	-
Isistius brasiliensis	BPBM 24549(1)		Pacific	272	230	194	163	168	158	57.44	56.89	46.51	24.21	8.81	3.55	18.05	3.49	16.97	20.49	18.09	3.58	13.55	-	-	5.25	3.07	1.78	25.41	27.68	100.29	46	15.94	-	7.81	4.47	8.22	-	16.87	10.2	8.39	5.26	8.14	8.86	21.28	12.37	9.37	9.3	21.01	5.9
Isistius brasiliensis	BPBM 24549(2)		Pacific	217	184	151	127	132	124	46.55	46.6	37.44	20.14	7.25	2.97	15.9	2.89	15.82	17.8	11.8	2.75	10.1	-	-	4.4	2.02	1.85	21.95	27.09	73.13	40.59	13.07	8.77	6.12	3.89	6.35	6.03	13.32	8.92	7.29	3.82	6.72	6.04	18.74	9.78	7.62	8.28	14.44	-
Isistius brasiliensis	UFPB 2669		Atlantic	433	371	313	256	280	263	85.5	84.09	67.75	34.67	12.68	5.48	24.03	8.07	26.26	-	18.57	5.15	19.42	15.88	11	10.46	4.26	3.59	44.19	44.91	168.27	78.14	25.12	19.35	12.3	8.44	11.86	9.85	28.55	21.46	14.65	7.81	12.21	11.3	31.74	16.18	13.26	16.96	42.45	6.23
Isistius brasiliensis	SCSFRI S07257	H	Pacific	442	381	317	262	294	280	89.31	88.98	72.6	38.16	13.13	5.57	26.64	7.23	25.69	32.33	23.82	5.11	22.49	13.79	8.88	8.61	4.2	2.87	40.19	48.24	168.94	78.37	30.9	21.7	14.28	8.31	17.43	13.94	31.82	20.16	15.47	9.29	16.44	16.55	30.49	15.52	16.13	19.8	37.06	16.04
[truncated: 22 more columns]
